# Supplementary material for: Inhibitory Effect of Synthetic Flavone Derivatives on Pan-Aurora Kinases: Induction of G2/M Cell-Cycle Arrest and Apoptosis in HCT116 Human Colon Cancer Cells
Source: Int J Mol Sci. 2018 Dec 17;19(12):4086. doi: 10.3390/ijms19124086 (PMC6320900; doi:10.3390/ijms19124086)

## Derivative 1

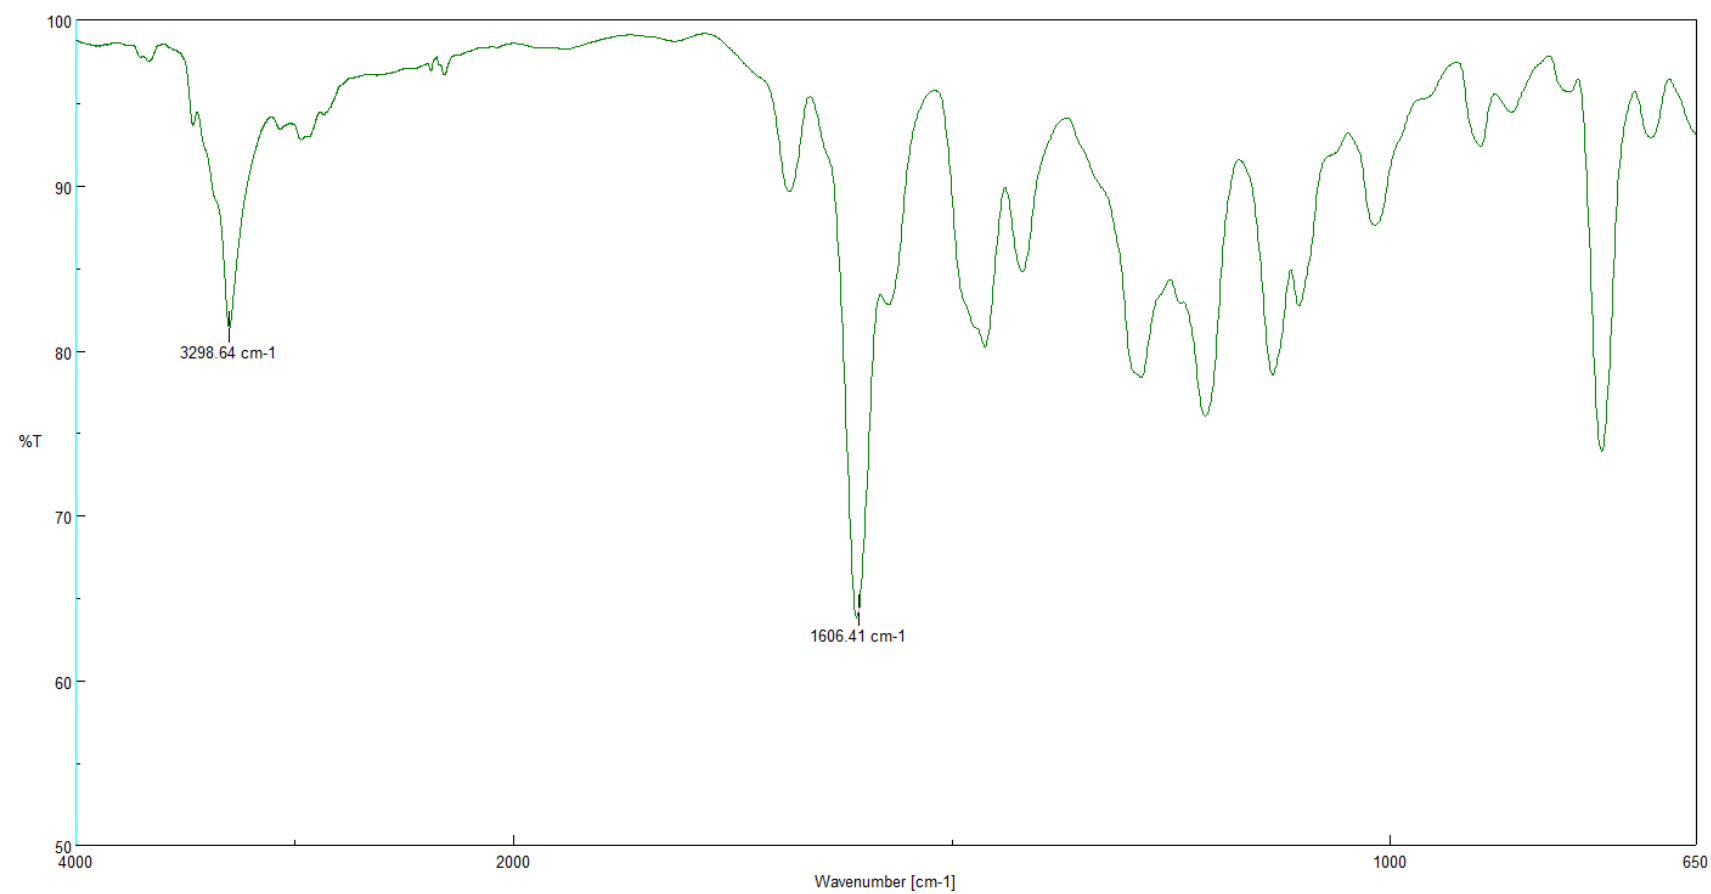

## Derivative 2

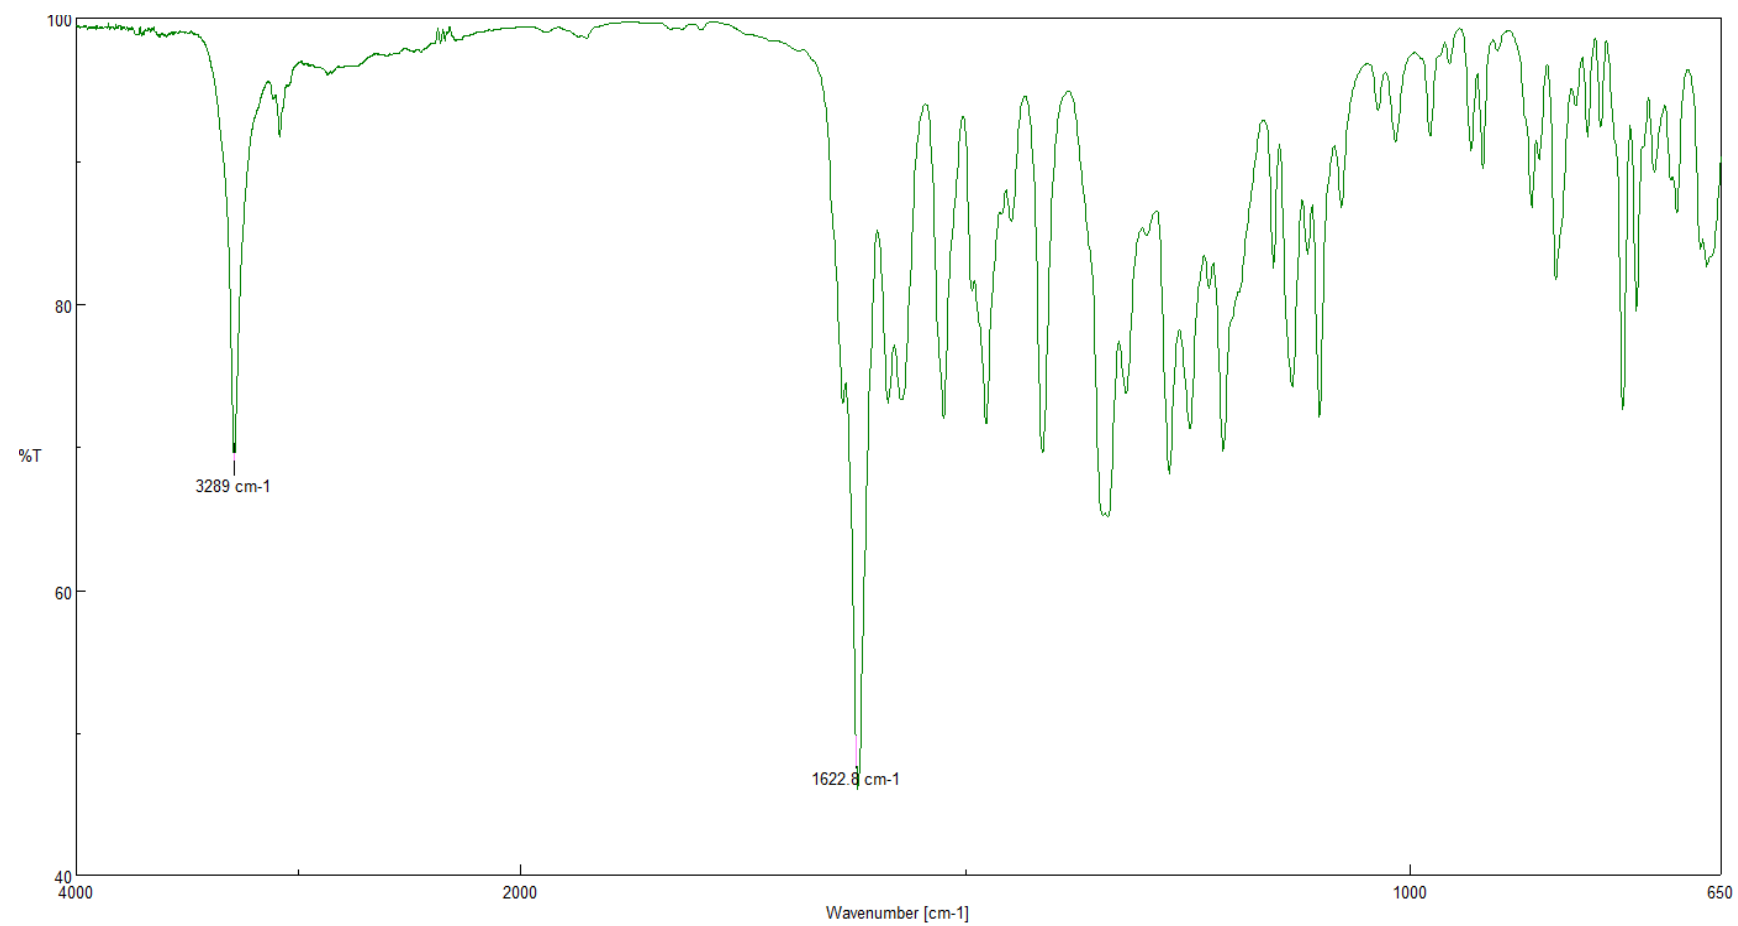

## Derivative 3

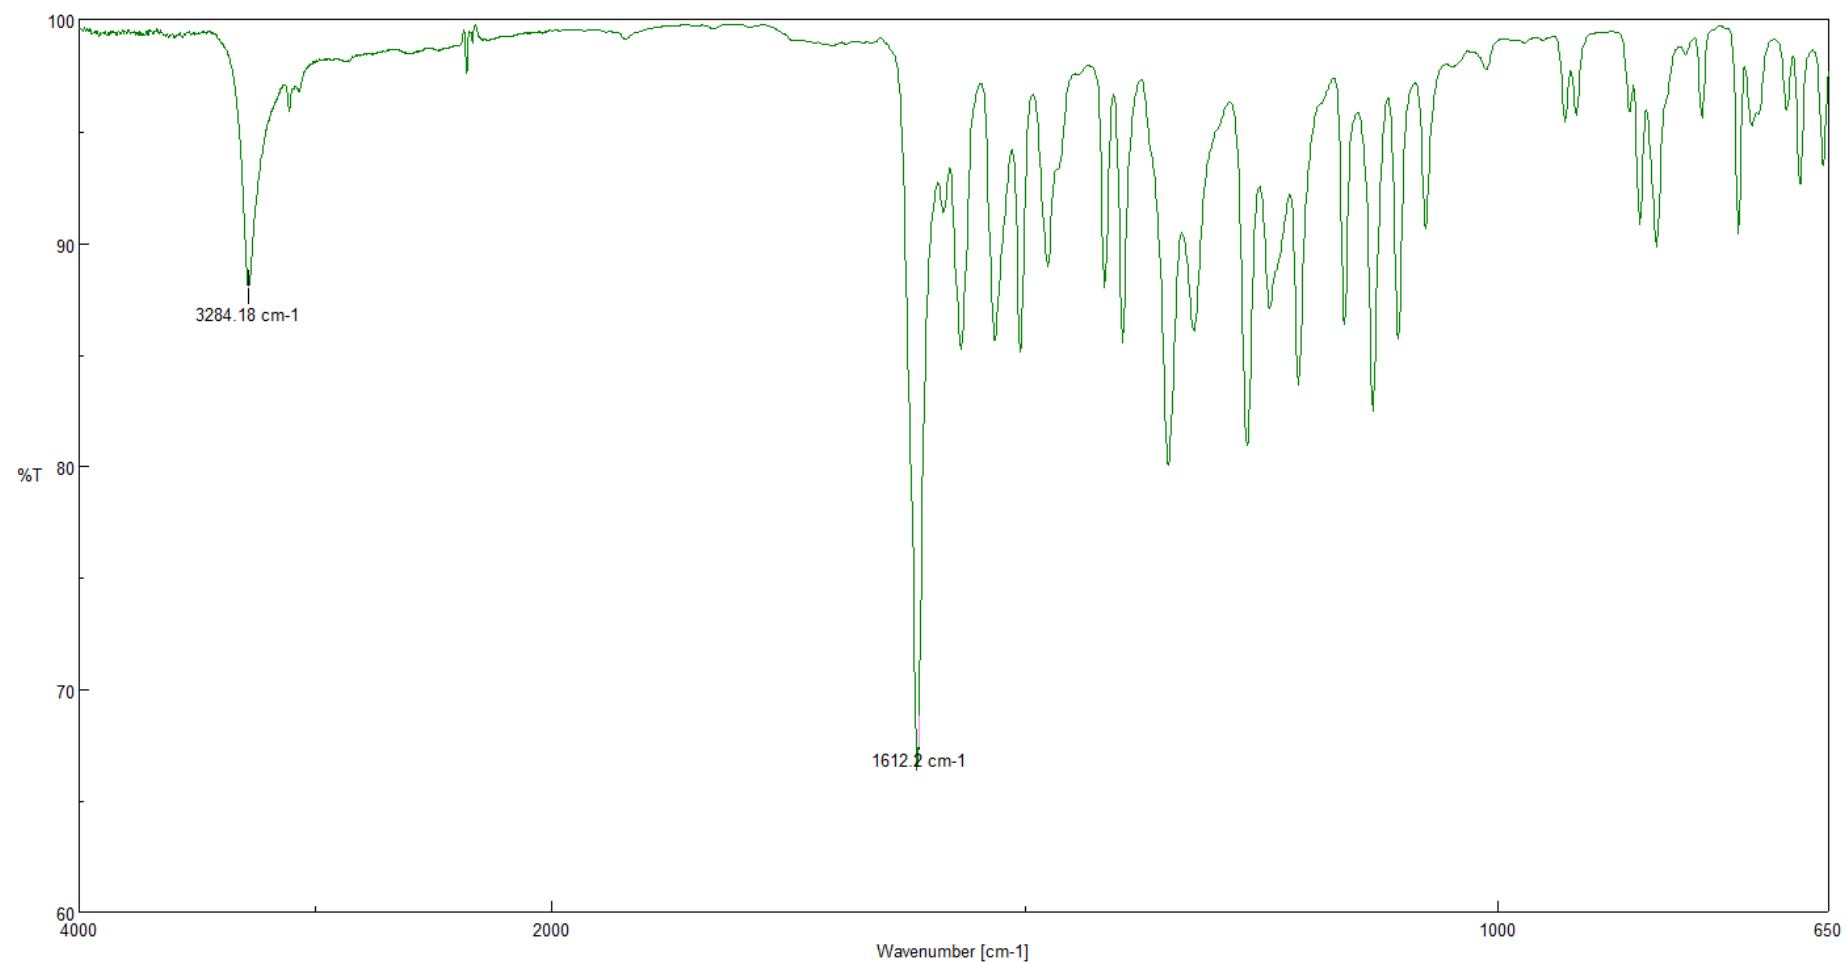

## Derivative 4

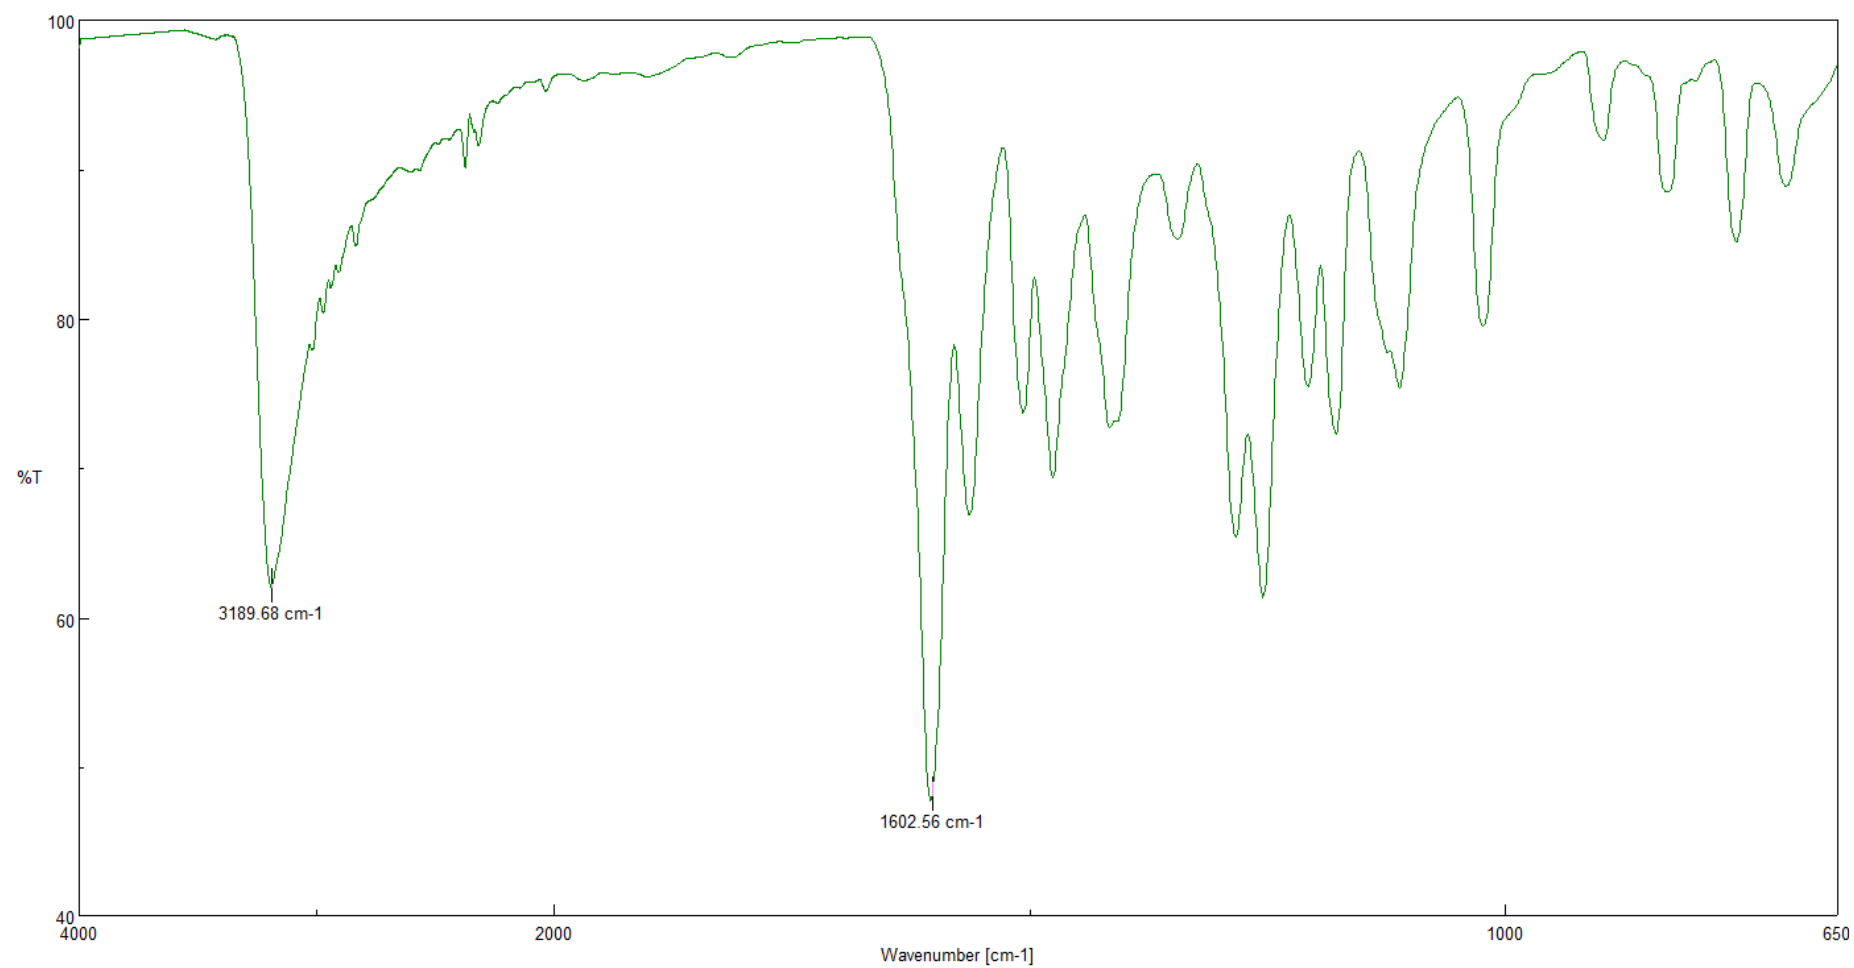

## Derivative 5

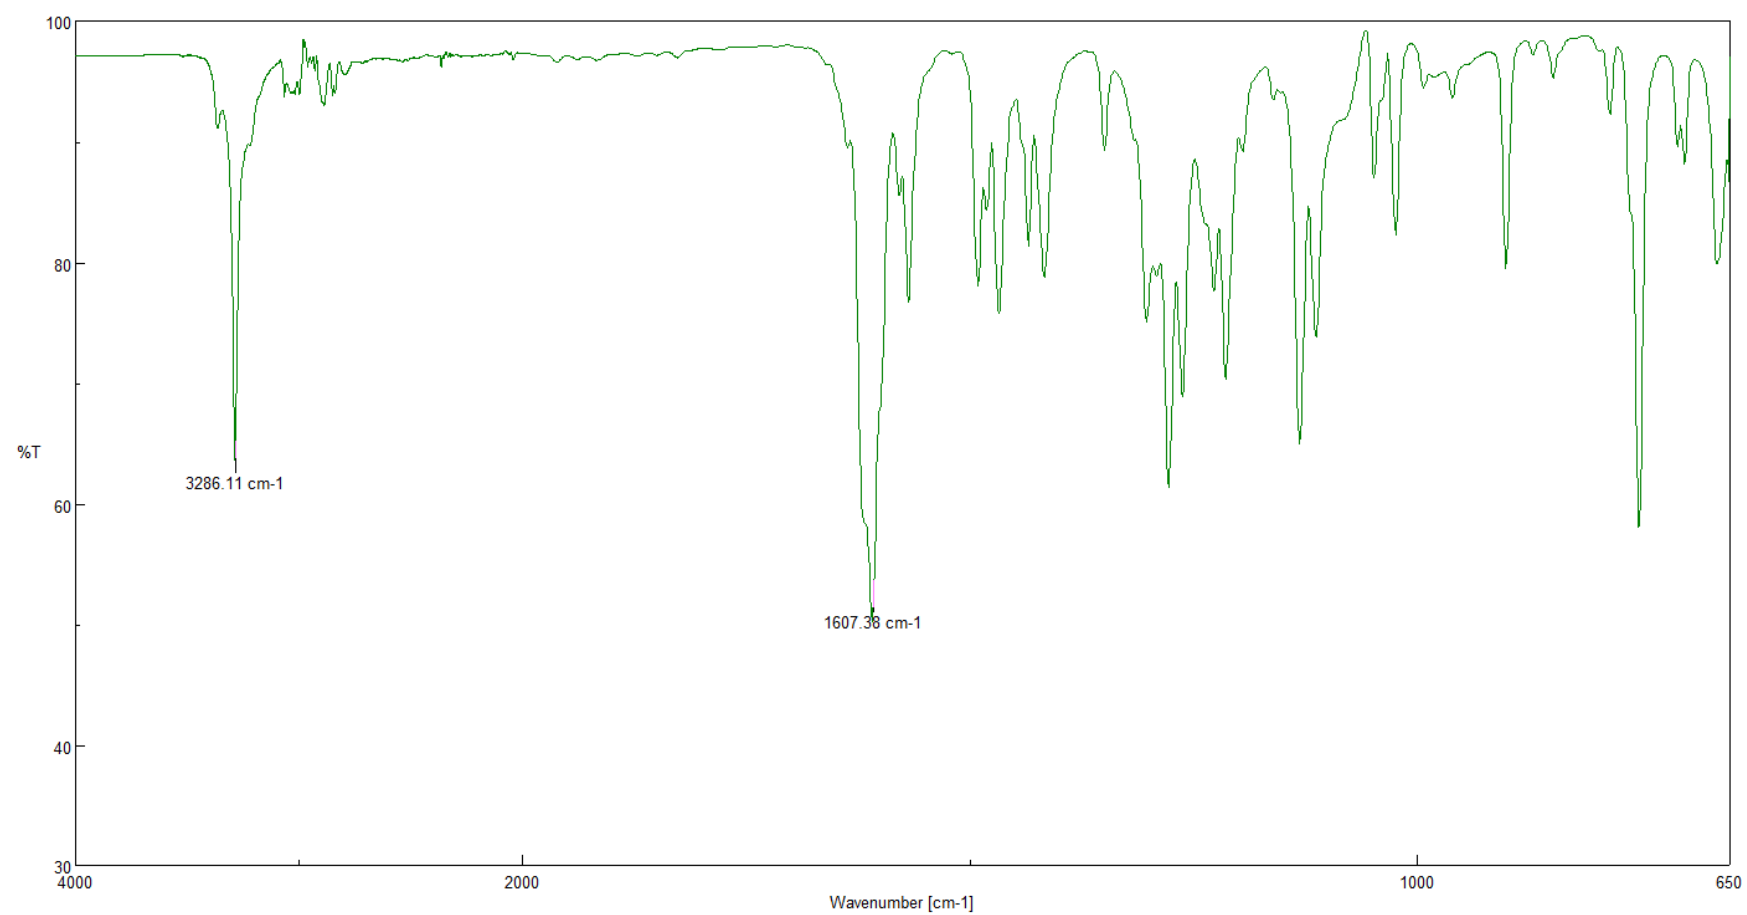

## Derivative 6

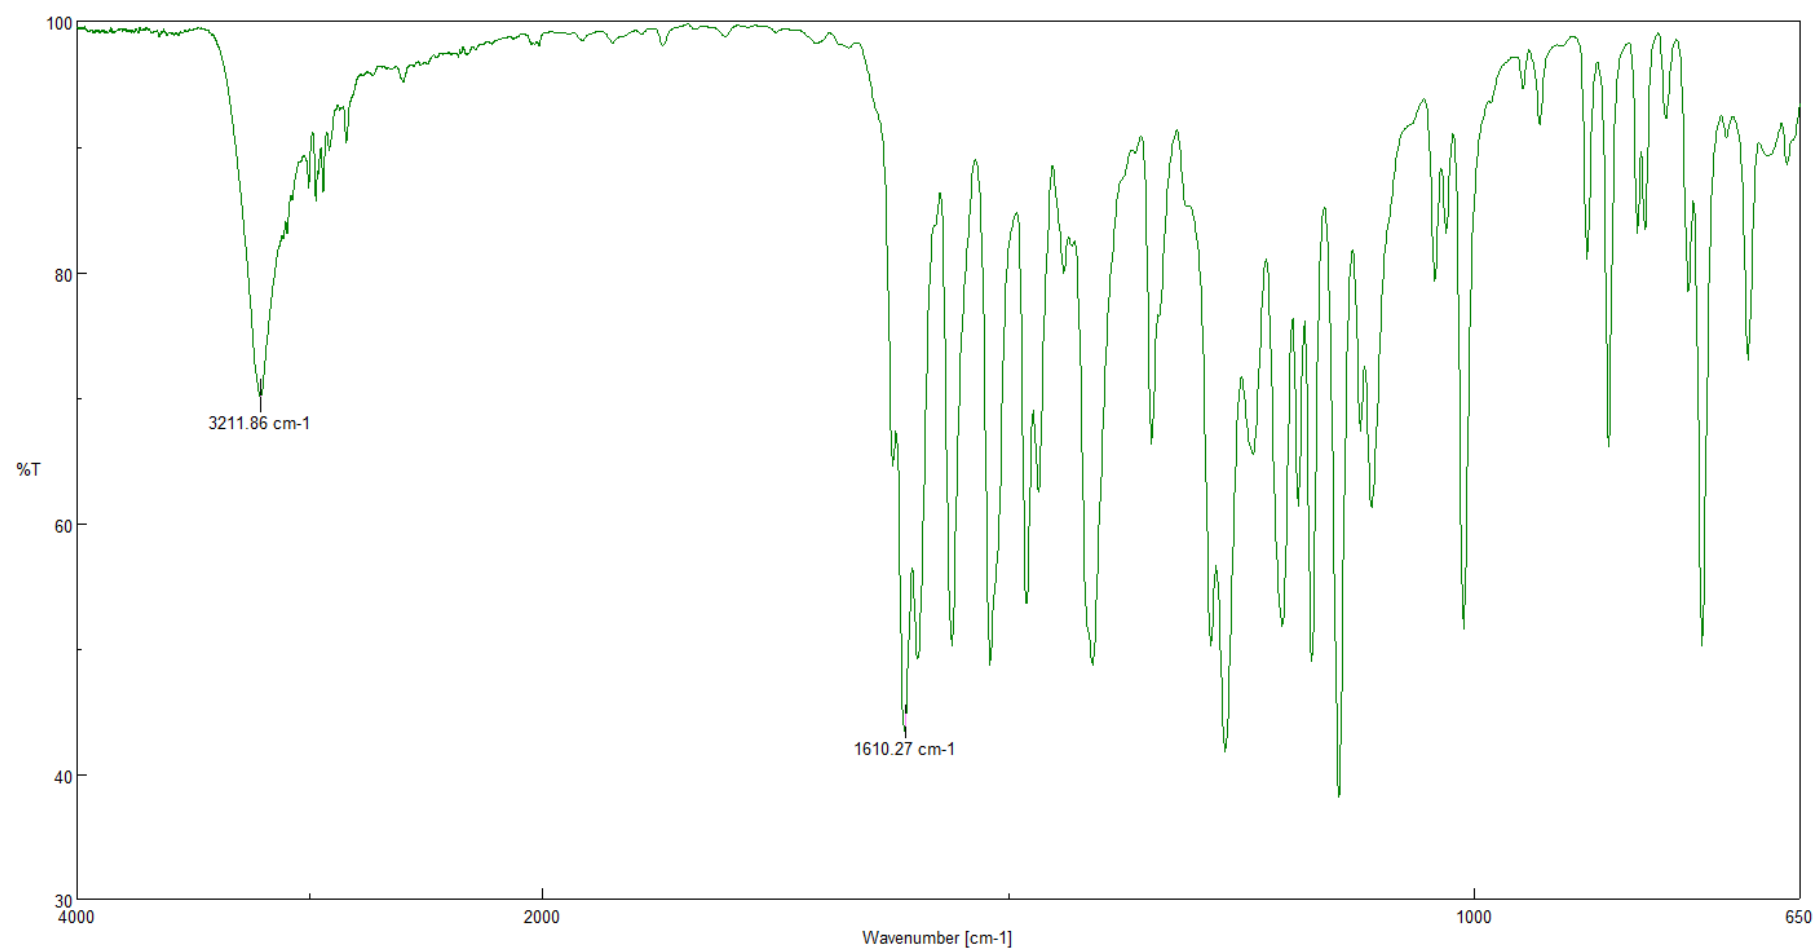

## Derivative 7

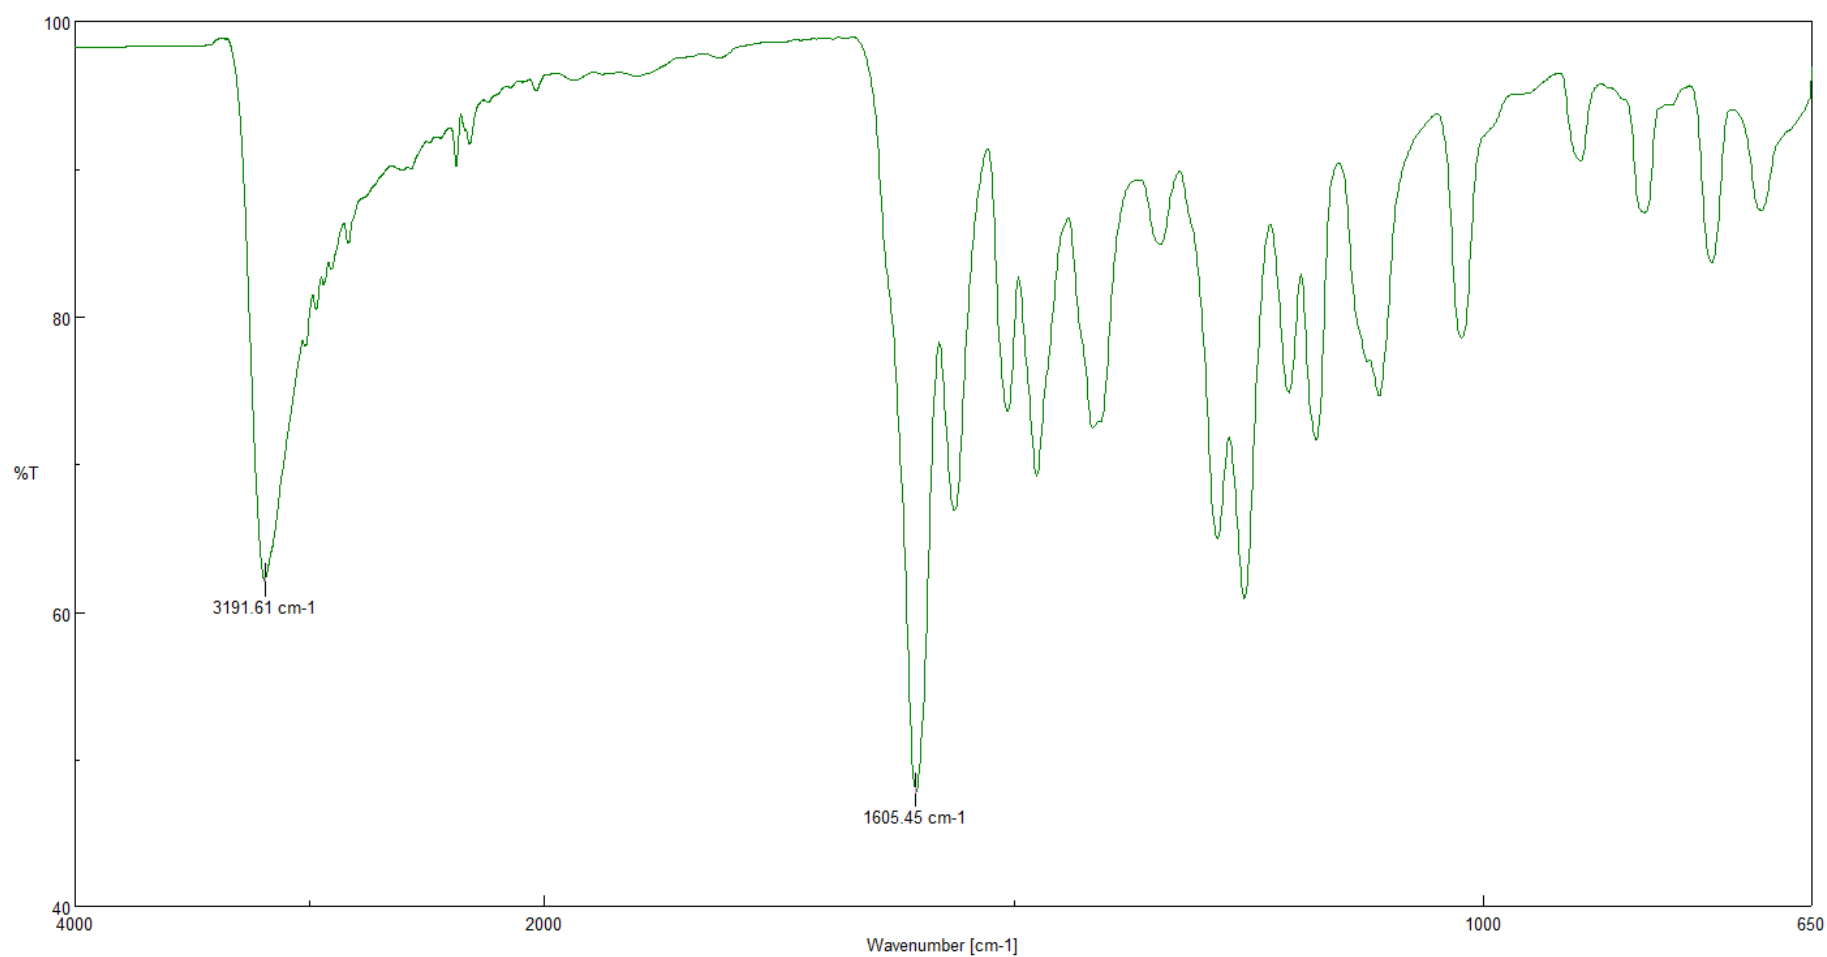

## Derivative 8

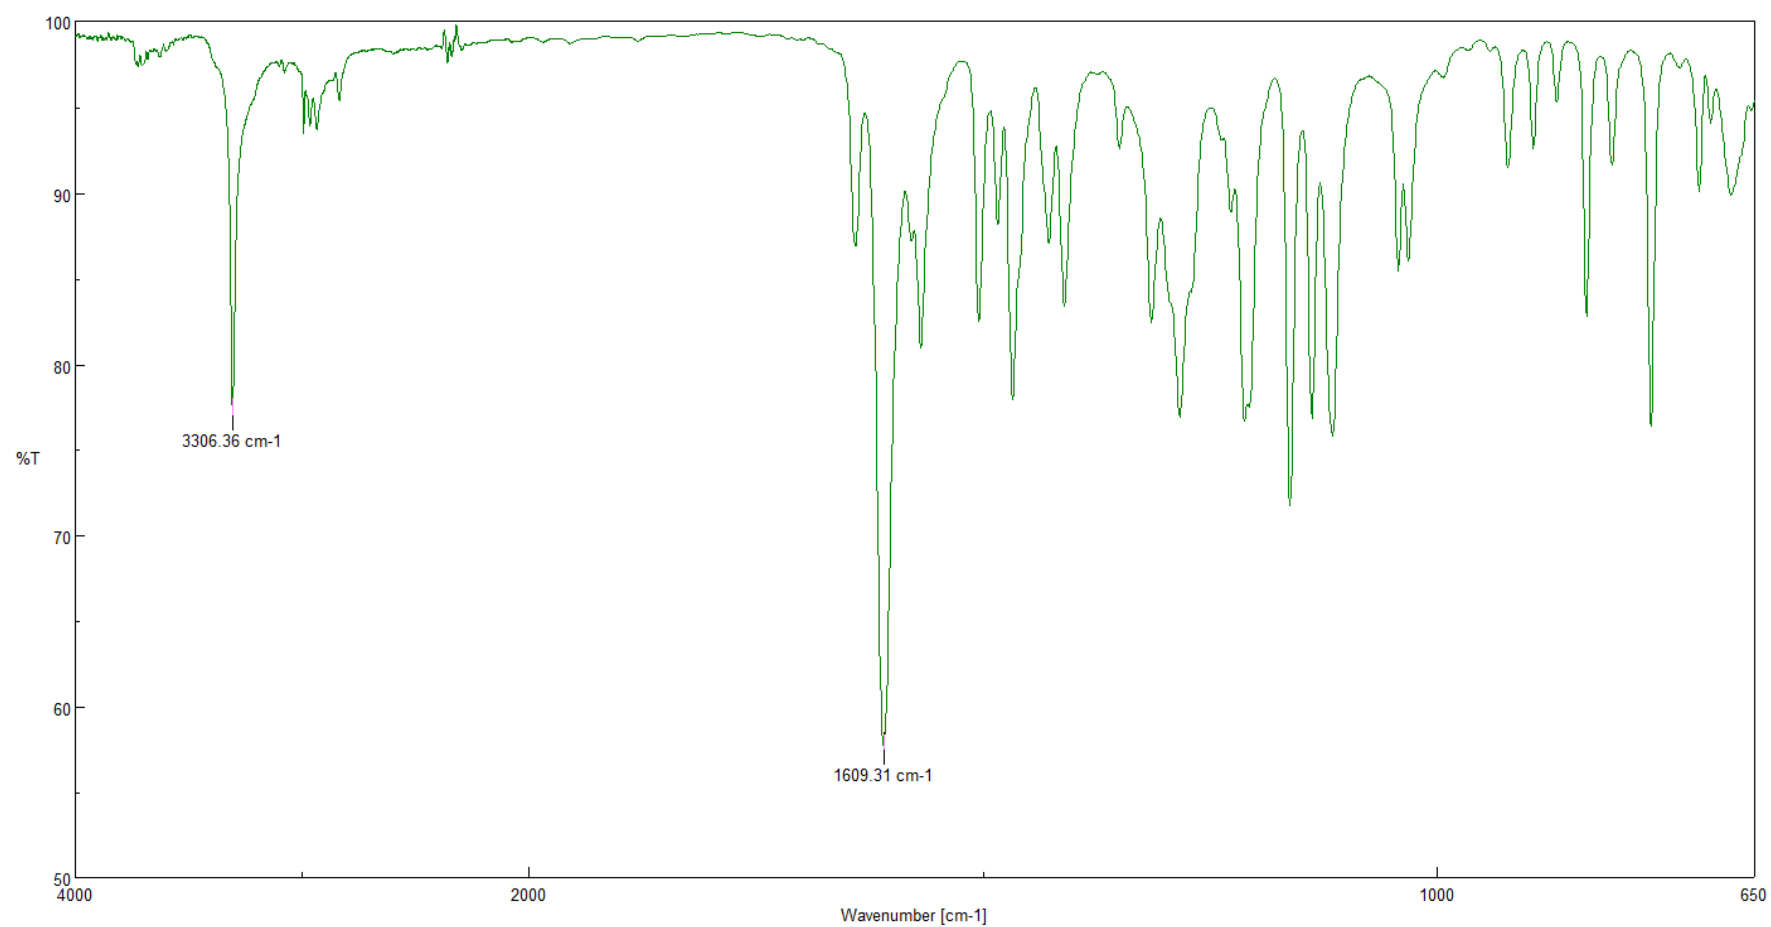

## Derivative 9

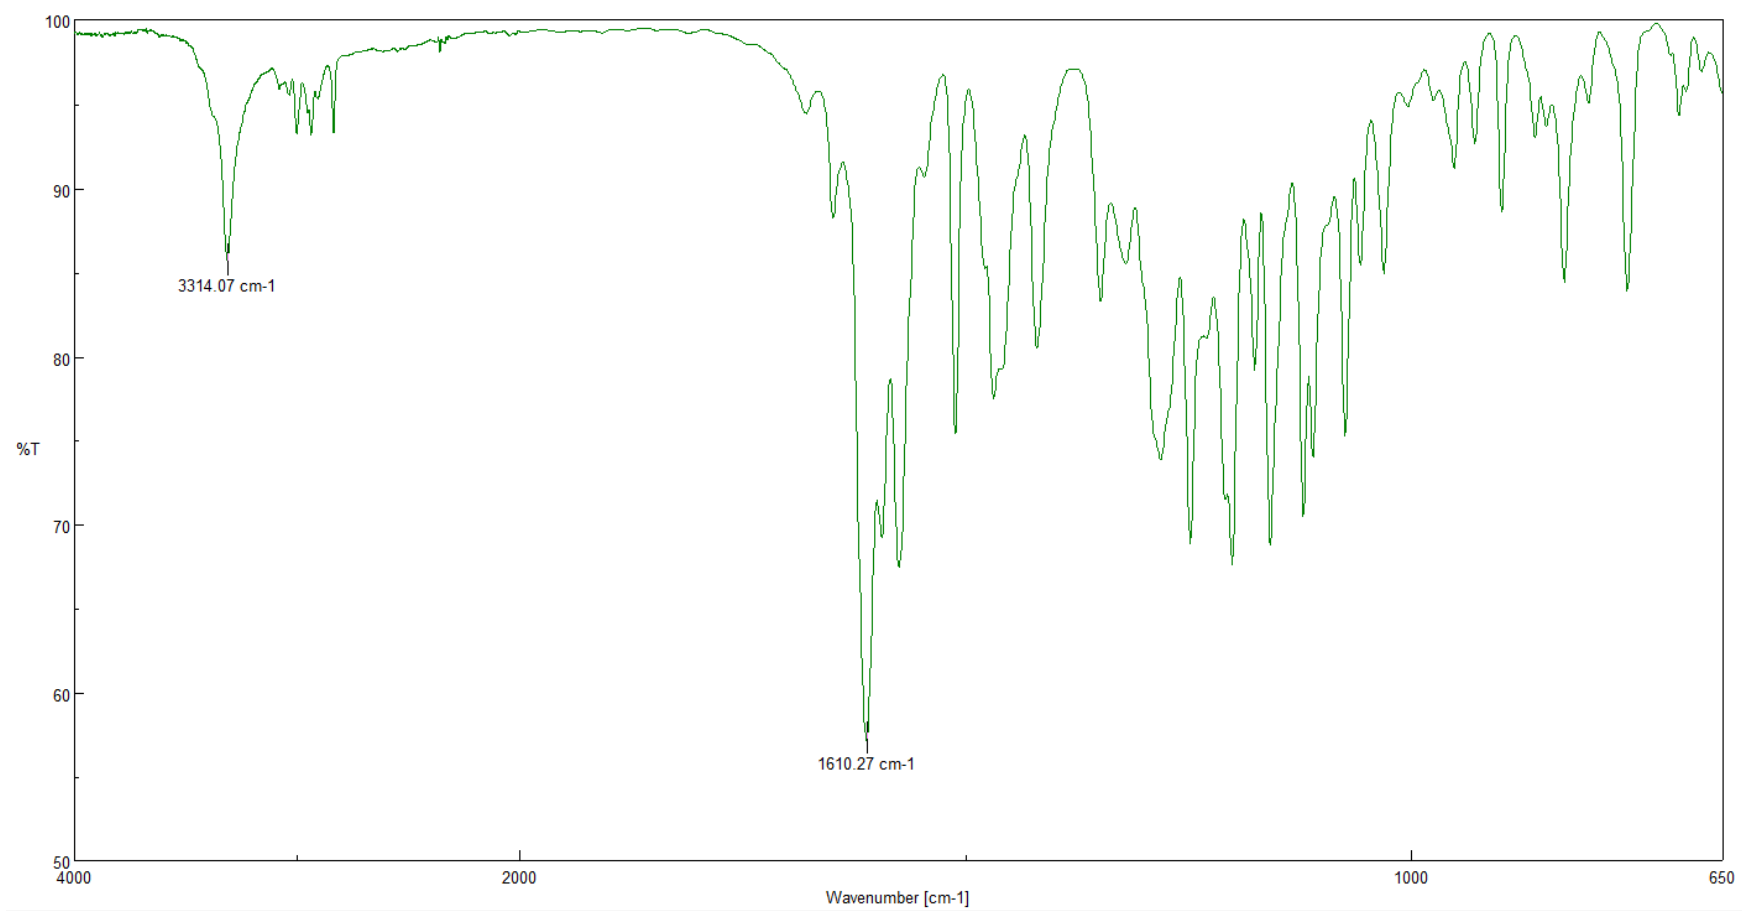

## Derivative 10

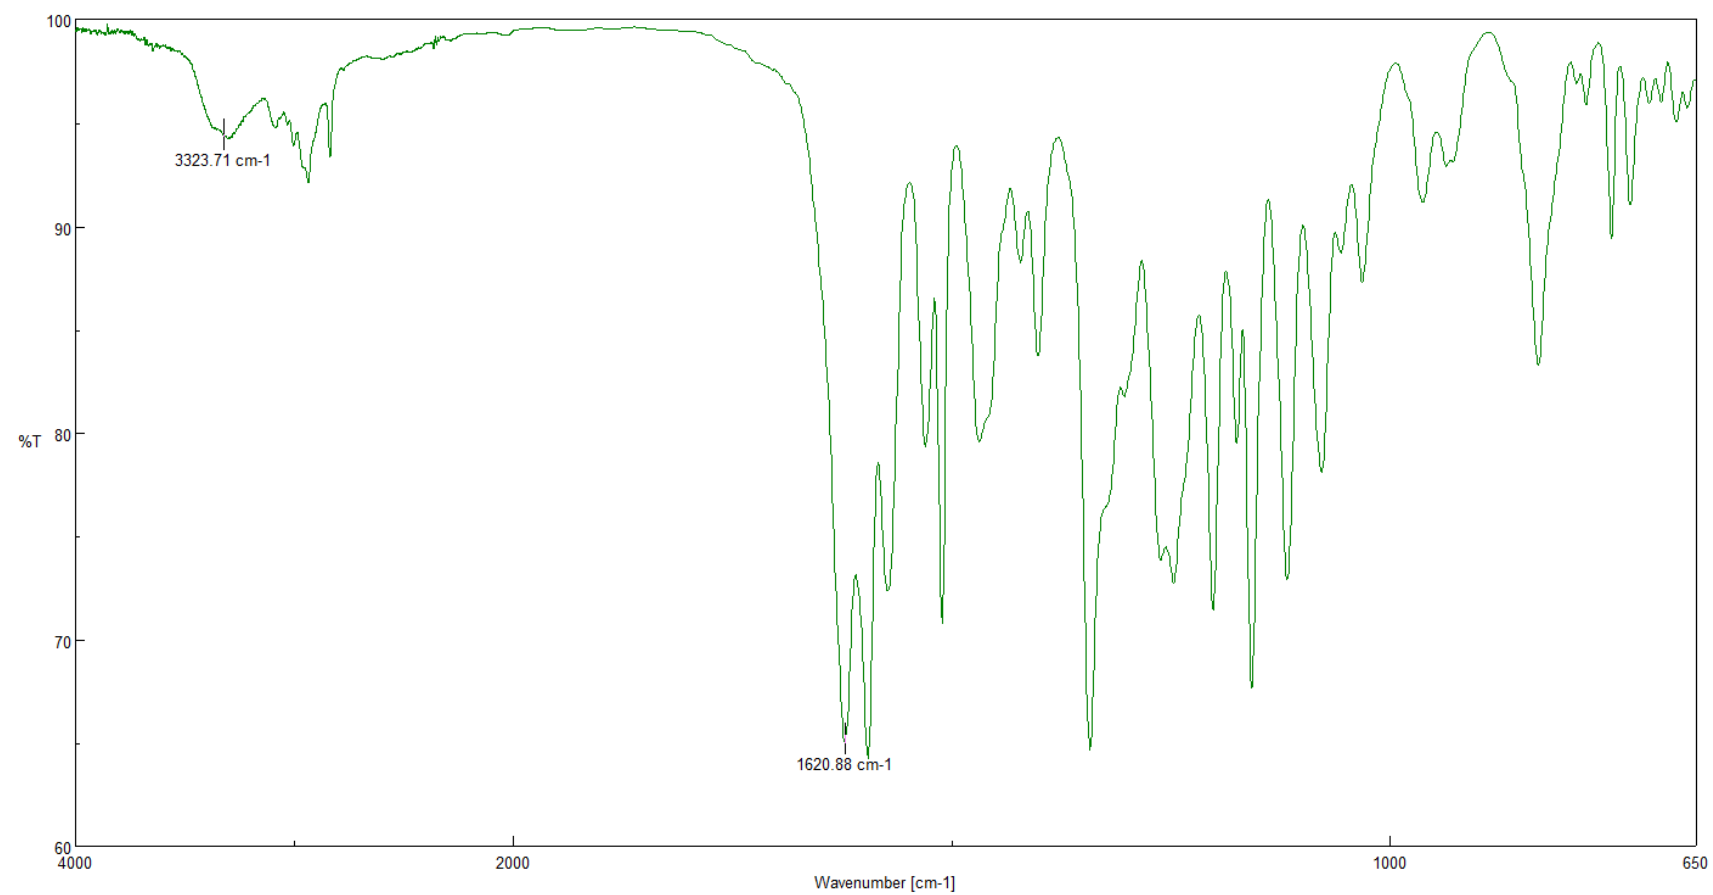

## Derivative 11

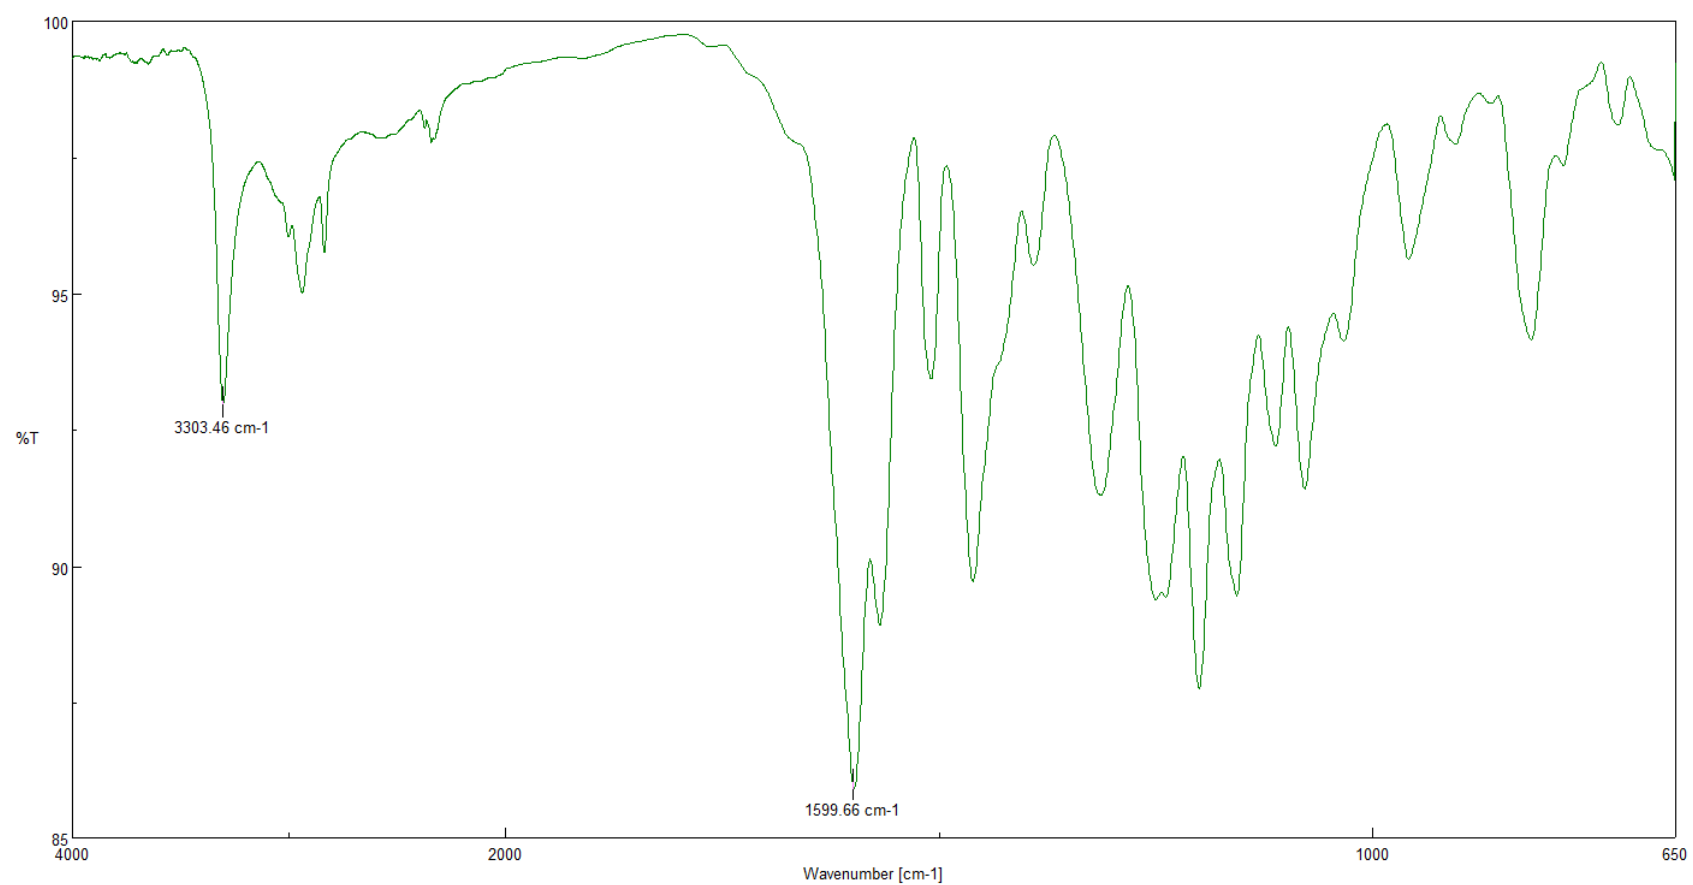

## Derivative 12

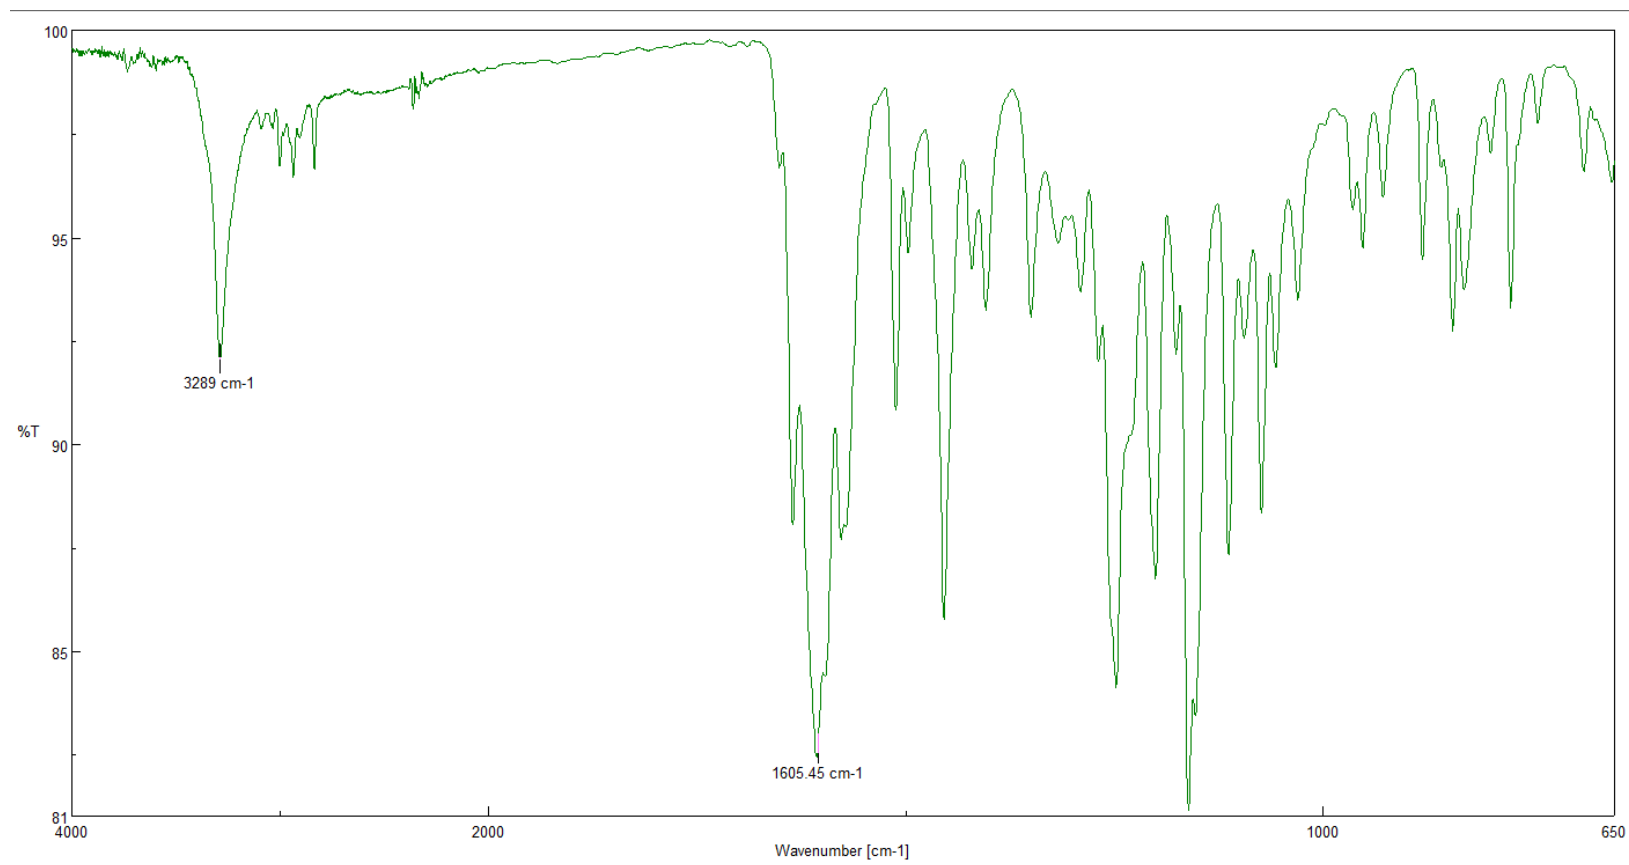

## Derivative 13

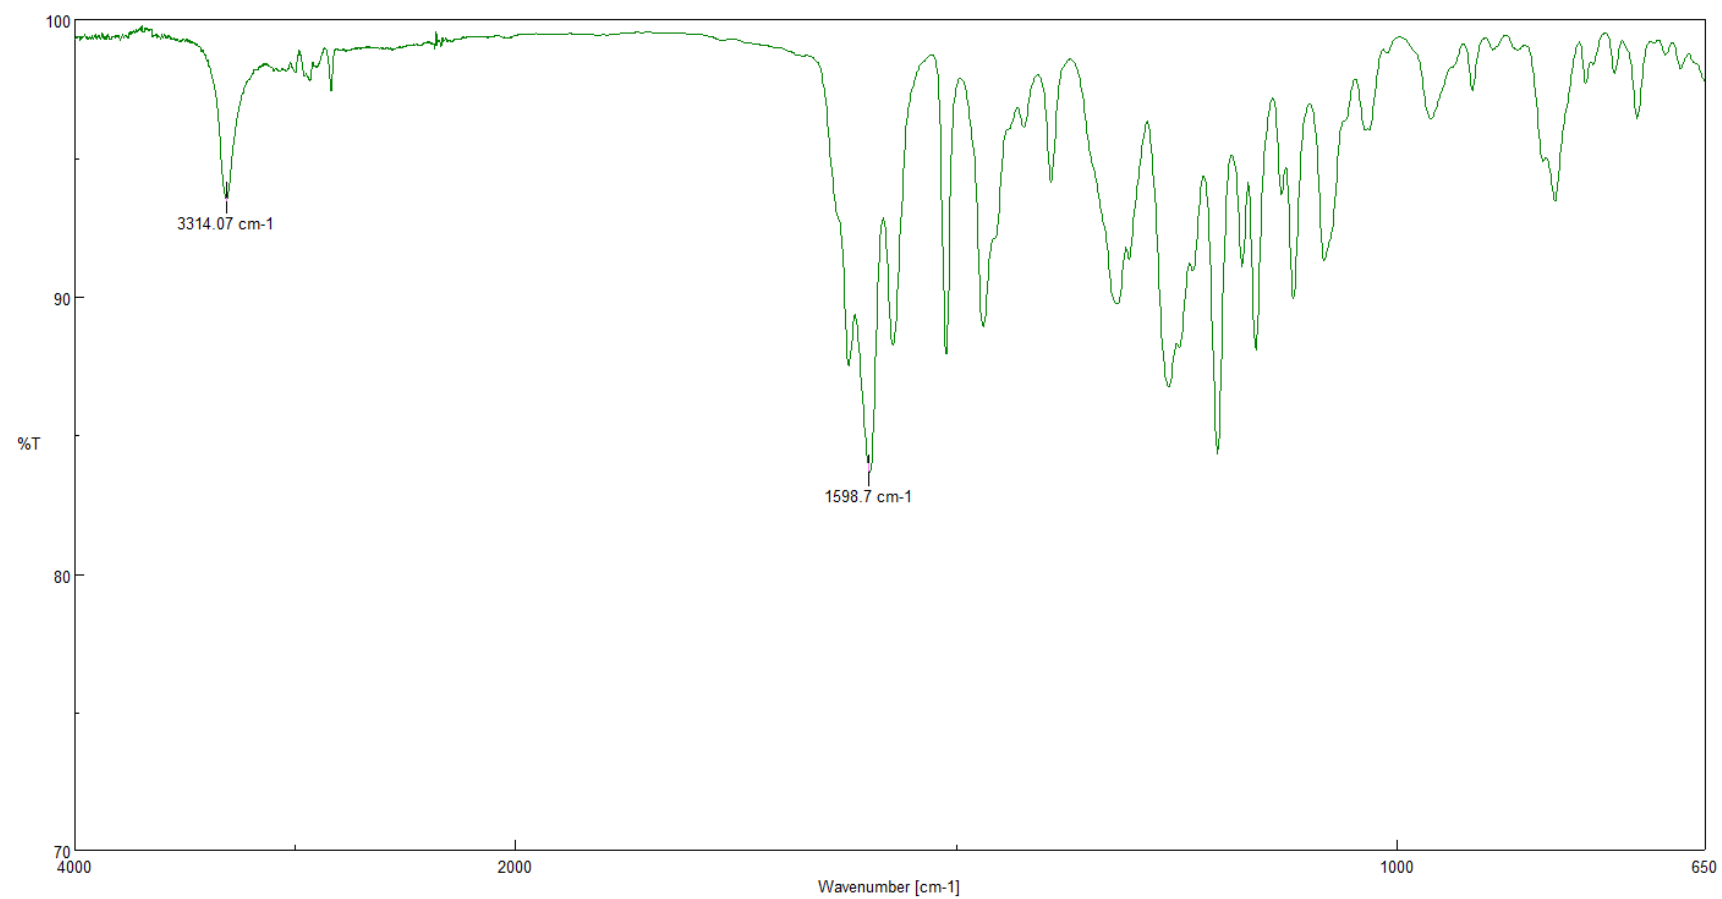

## Derivative 14

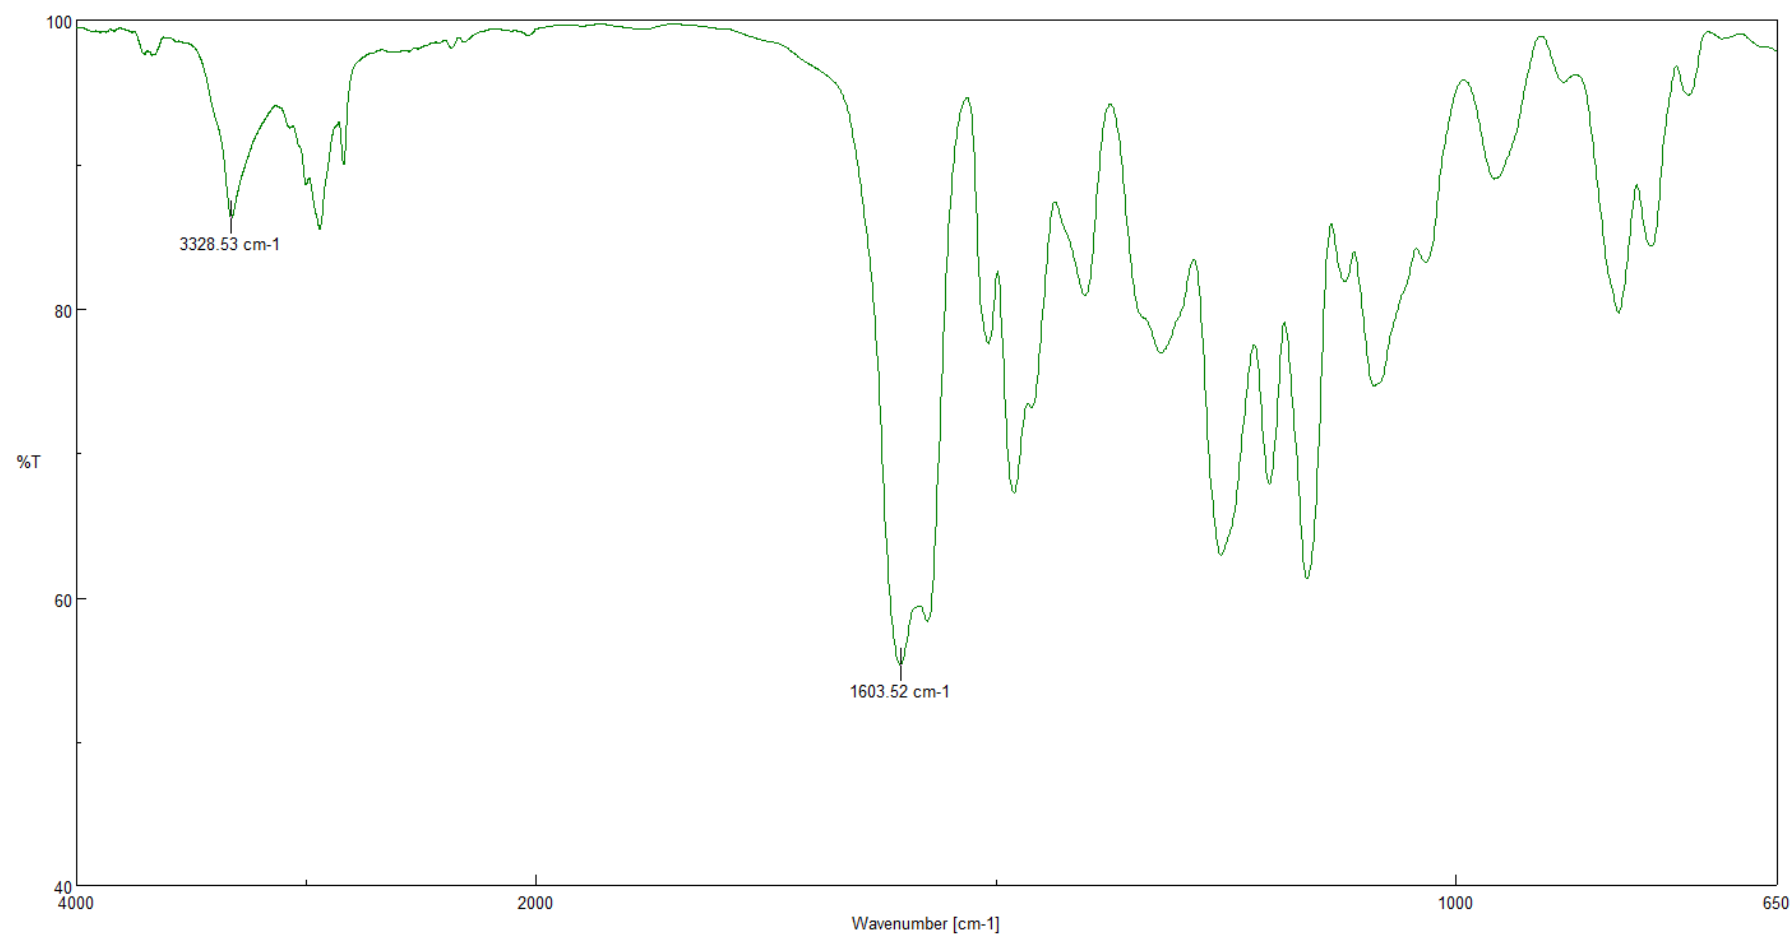

## Derivative 15

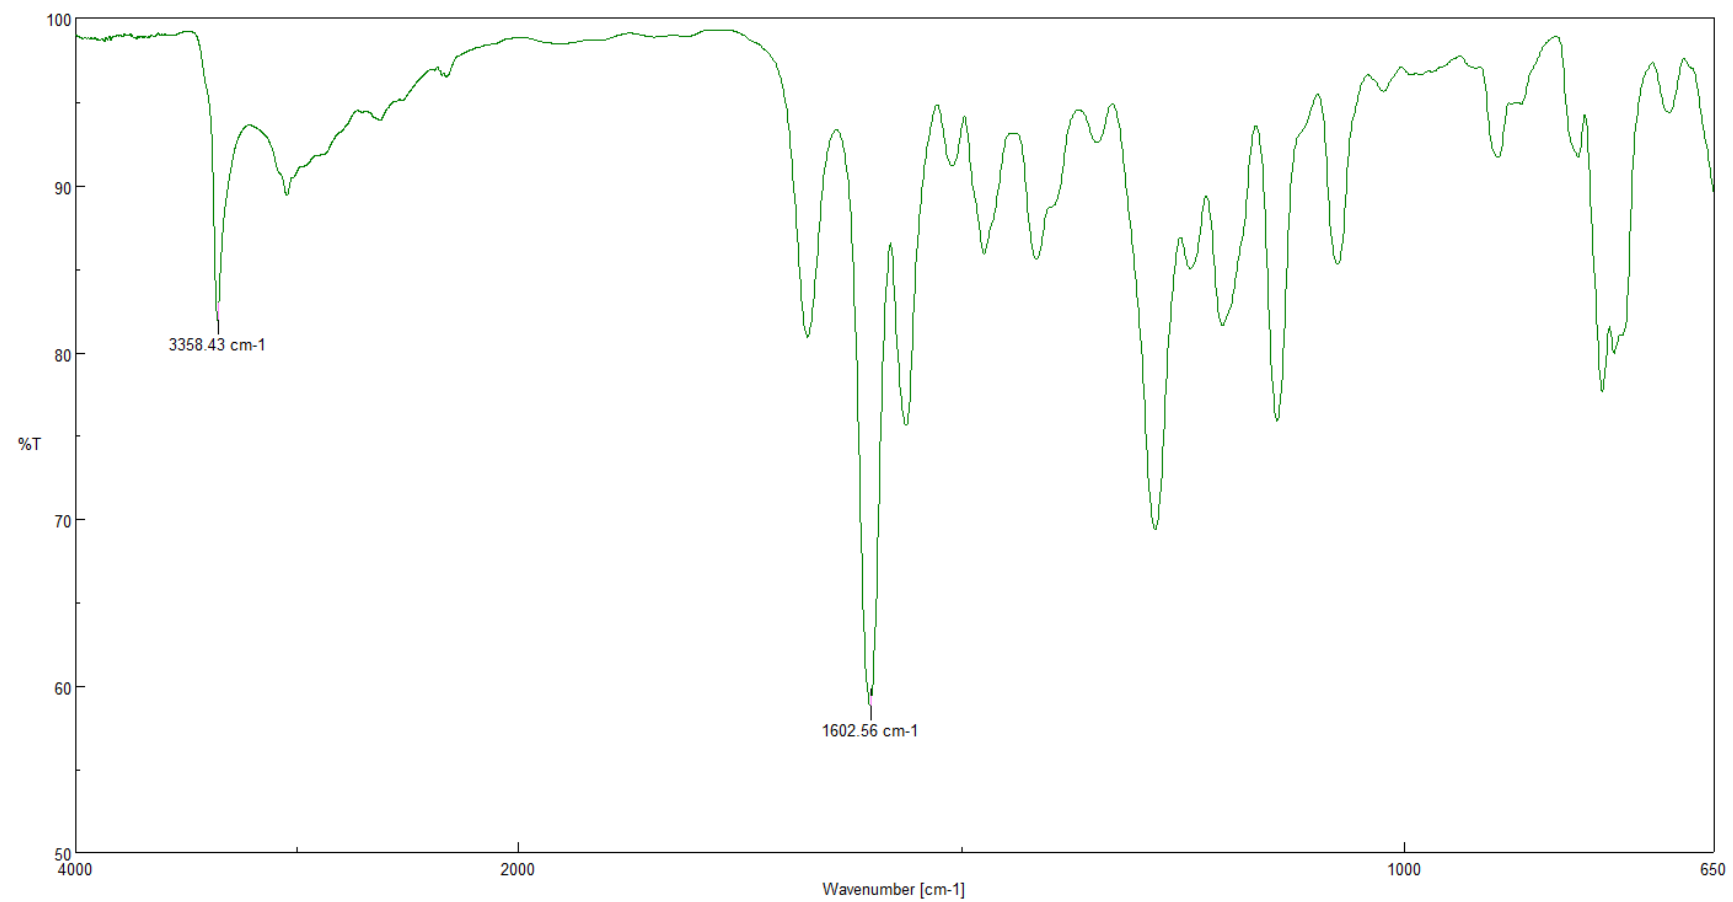

## Derivative 16

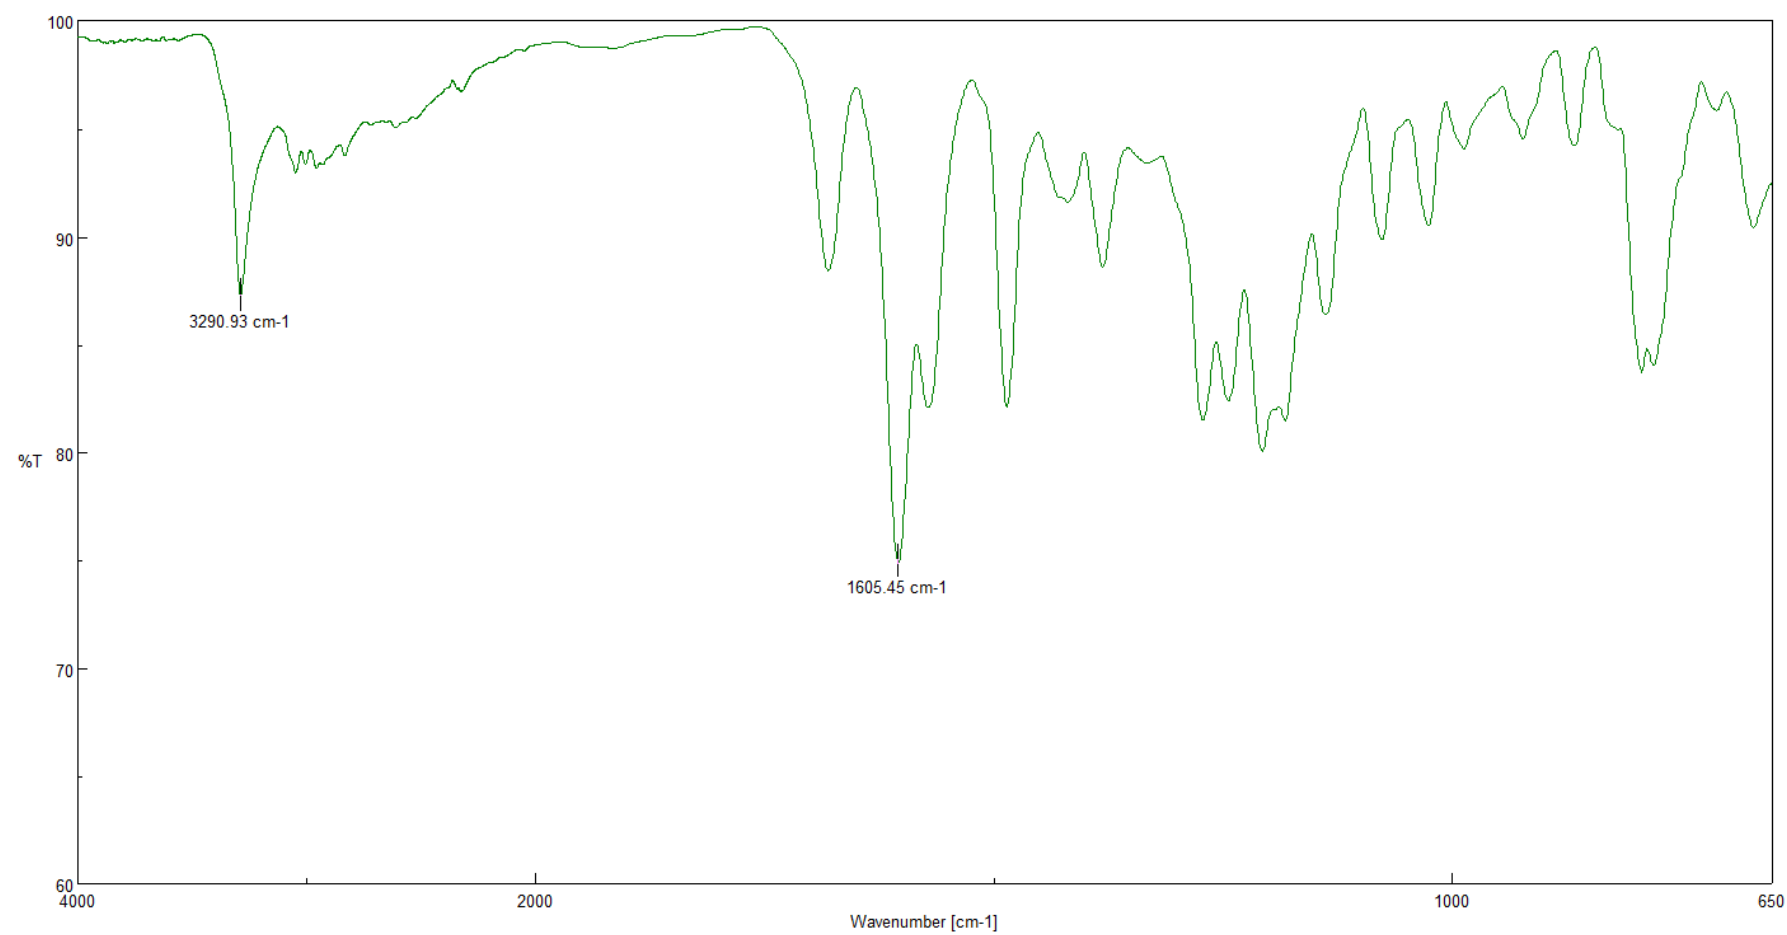

## Derivative 17

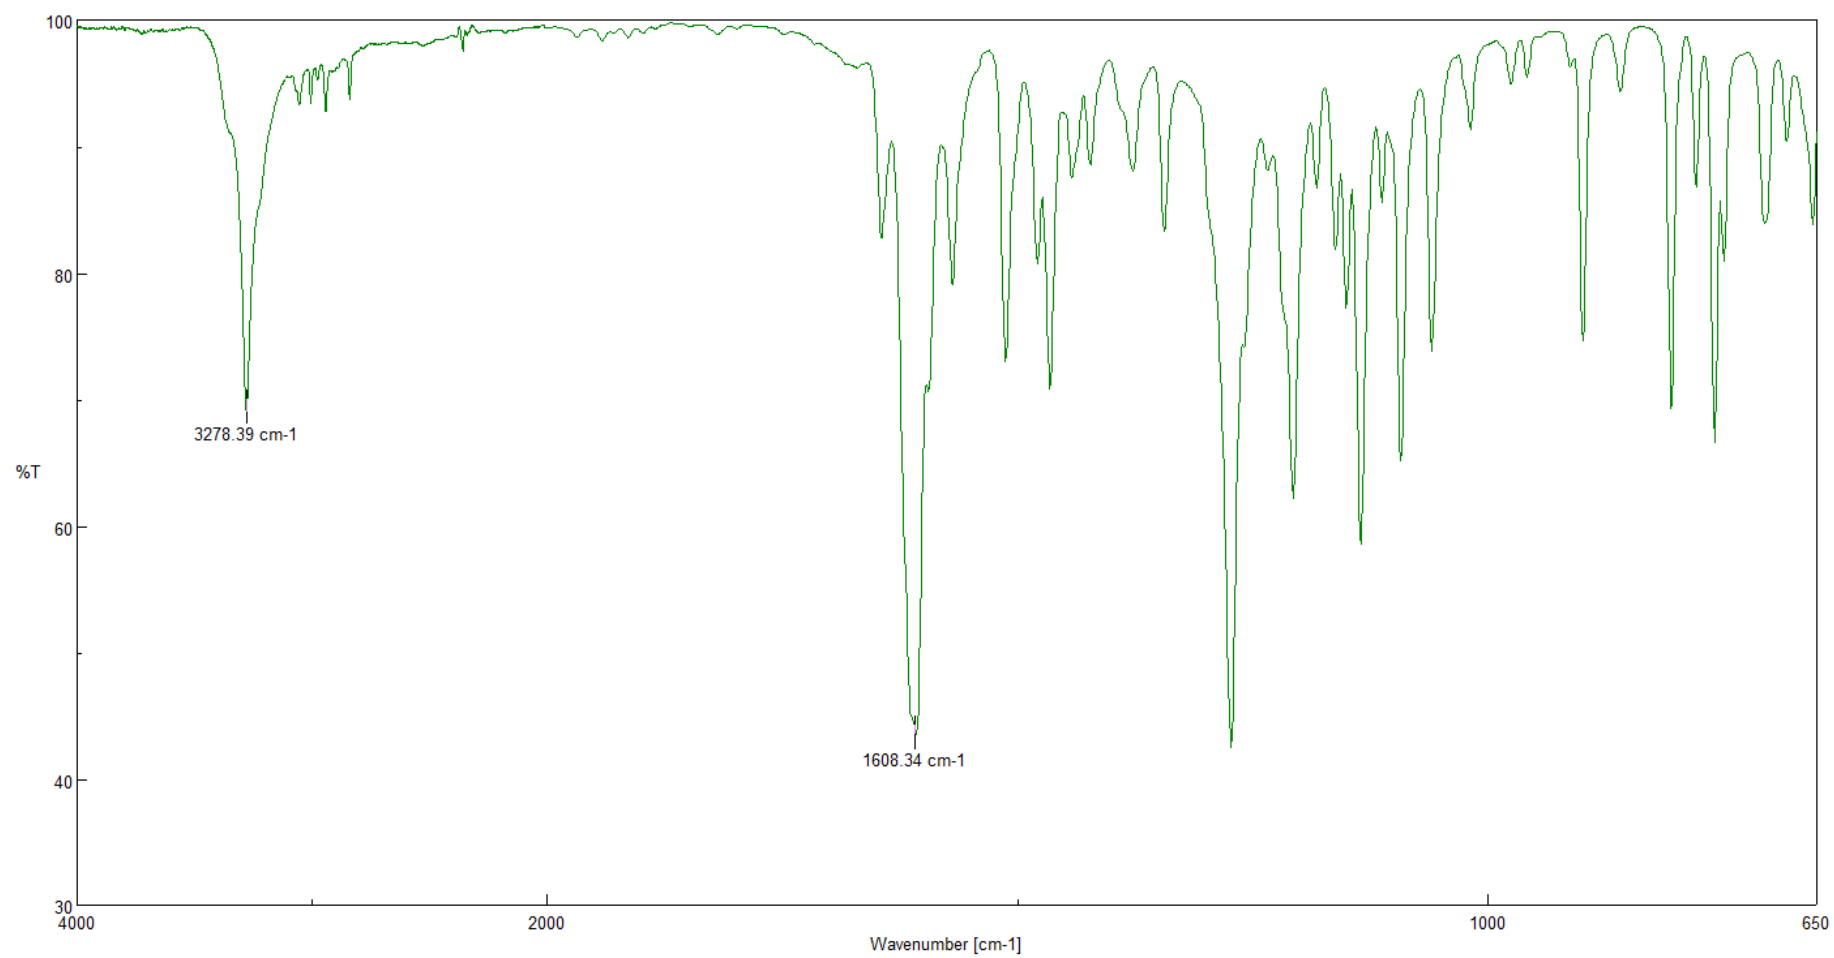

## Derivative 18

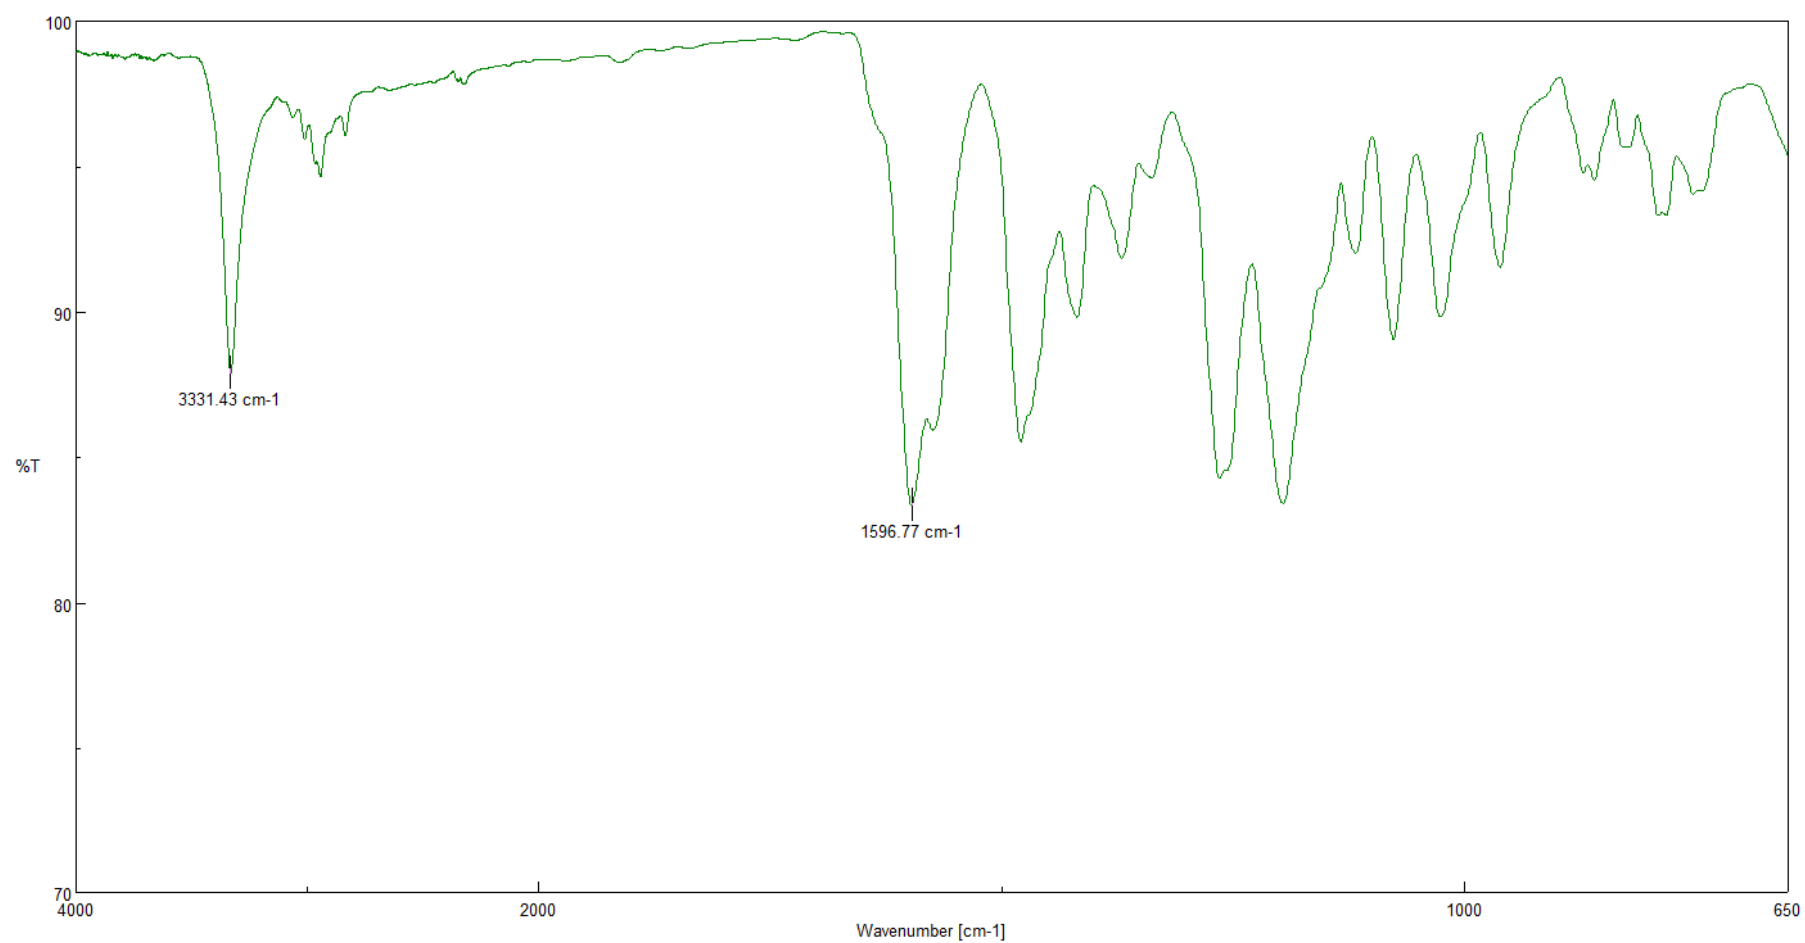

## Derivative 19

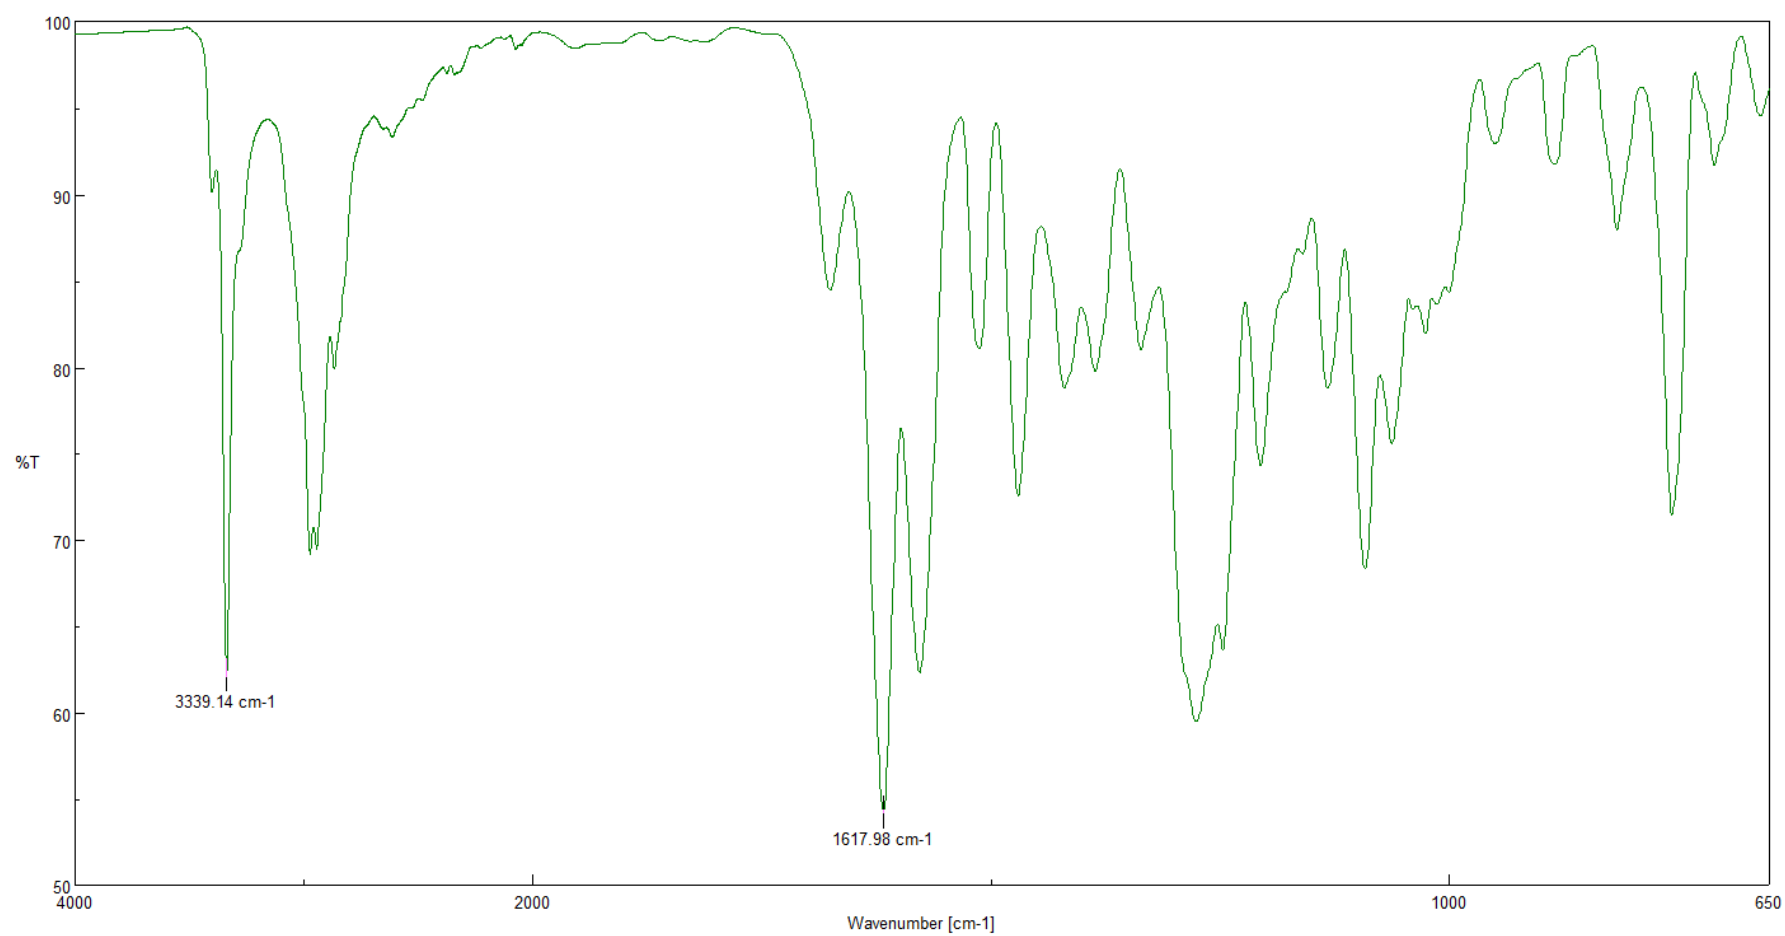

## Derivative 20

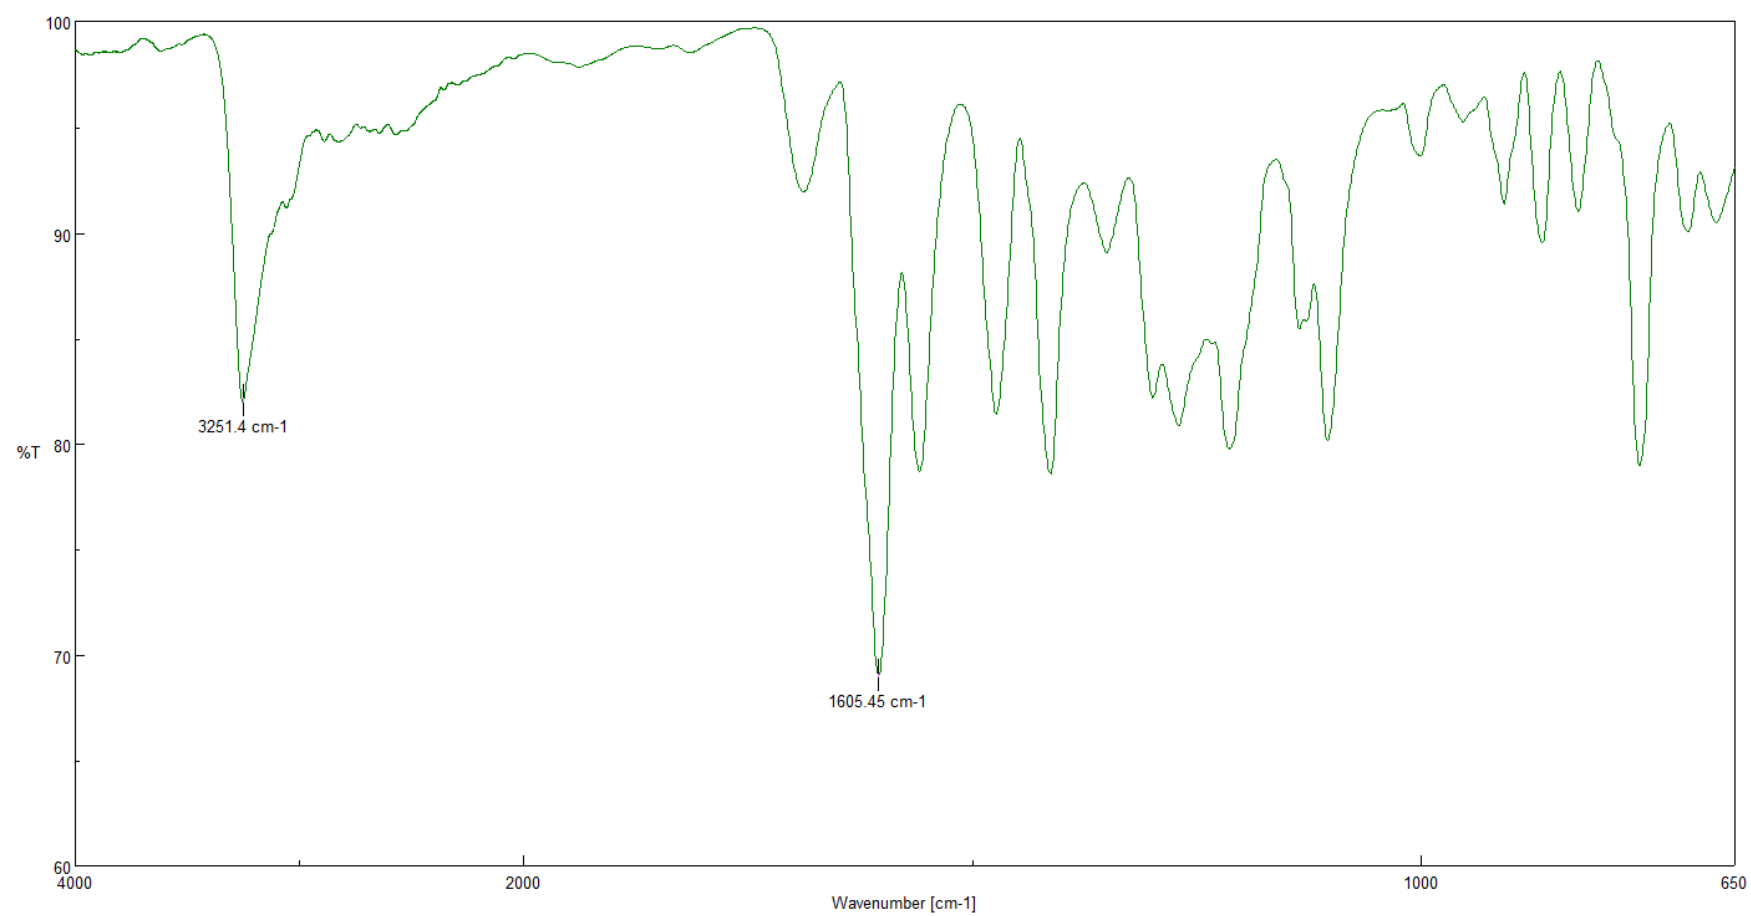

## Derivative 21

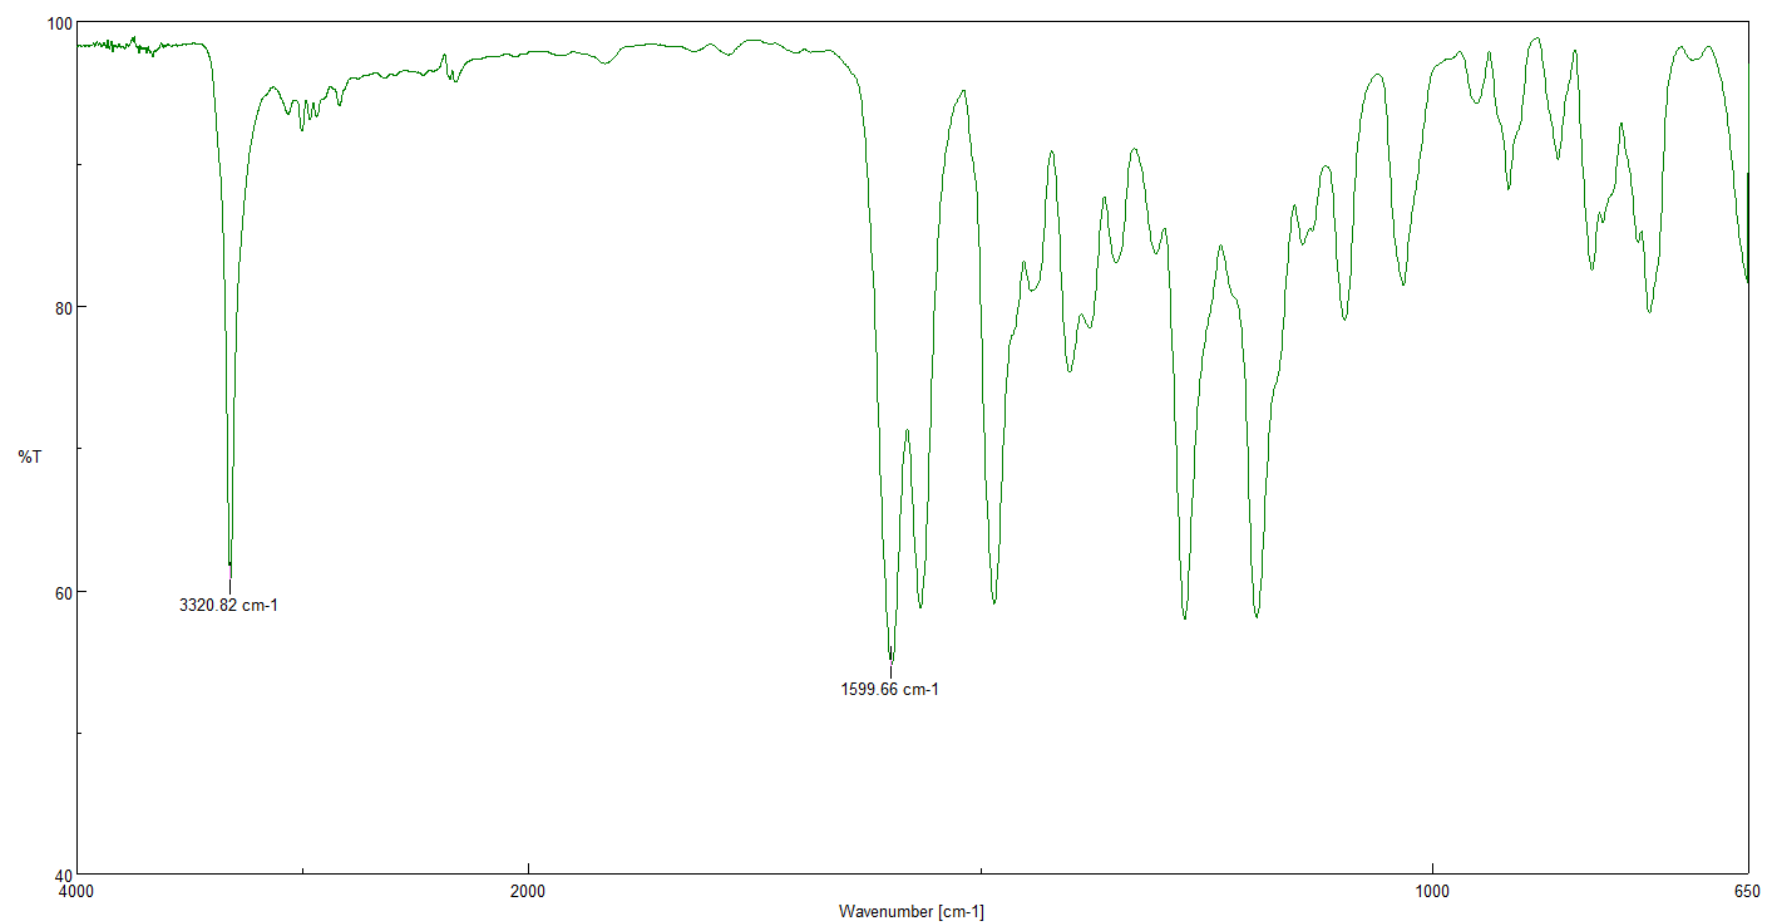

## Derivative 22

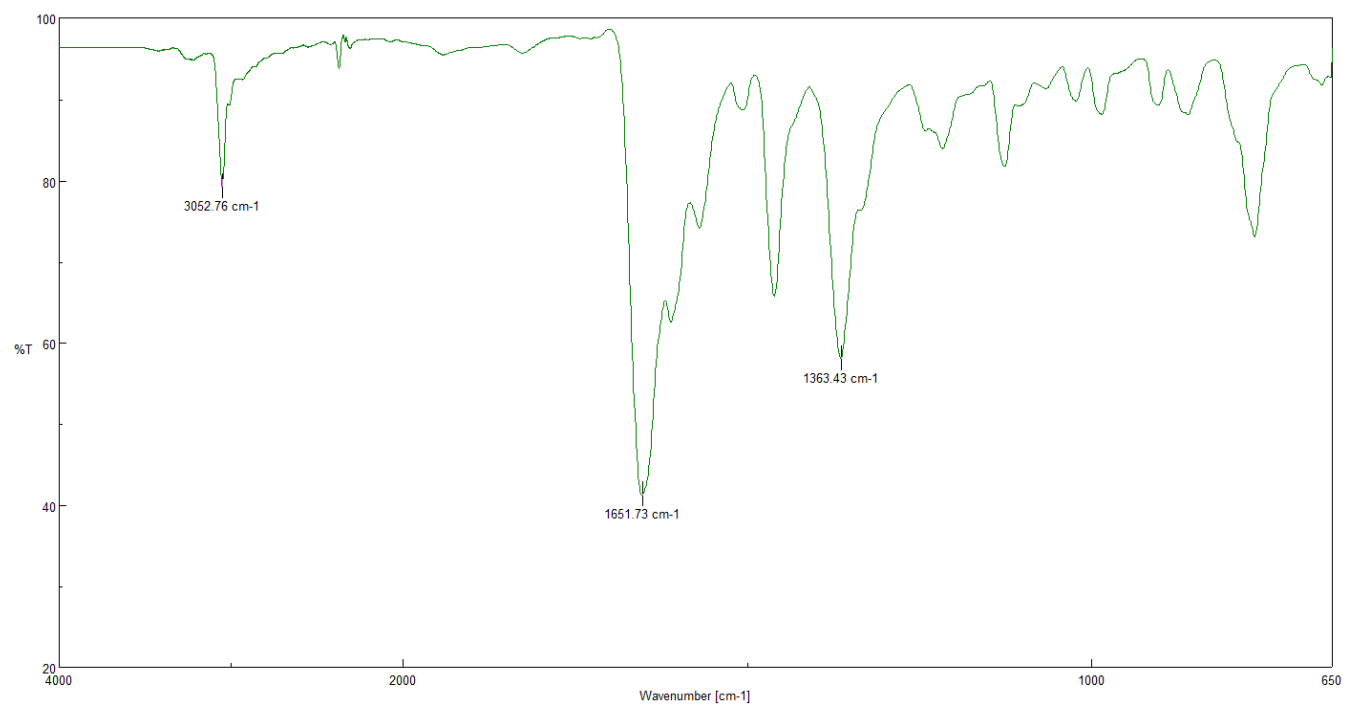

## Derivative 23

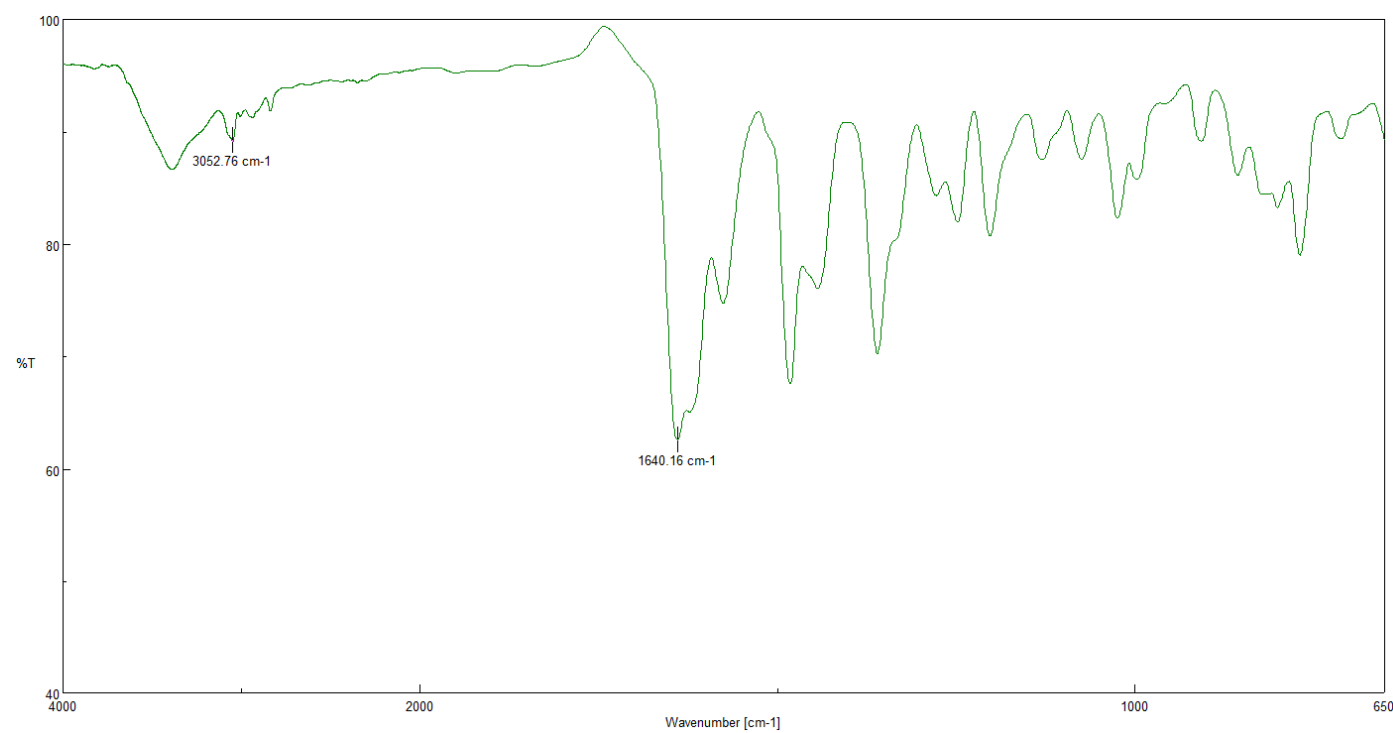

## Derivative 24

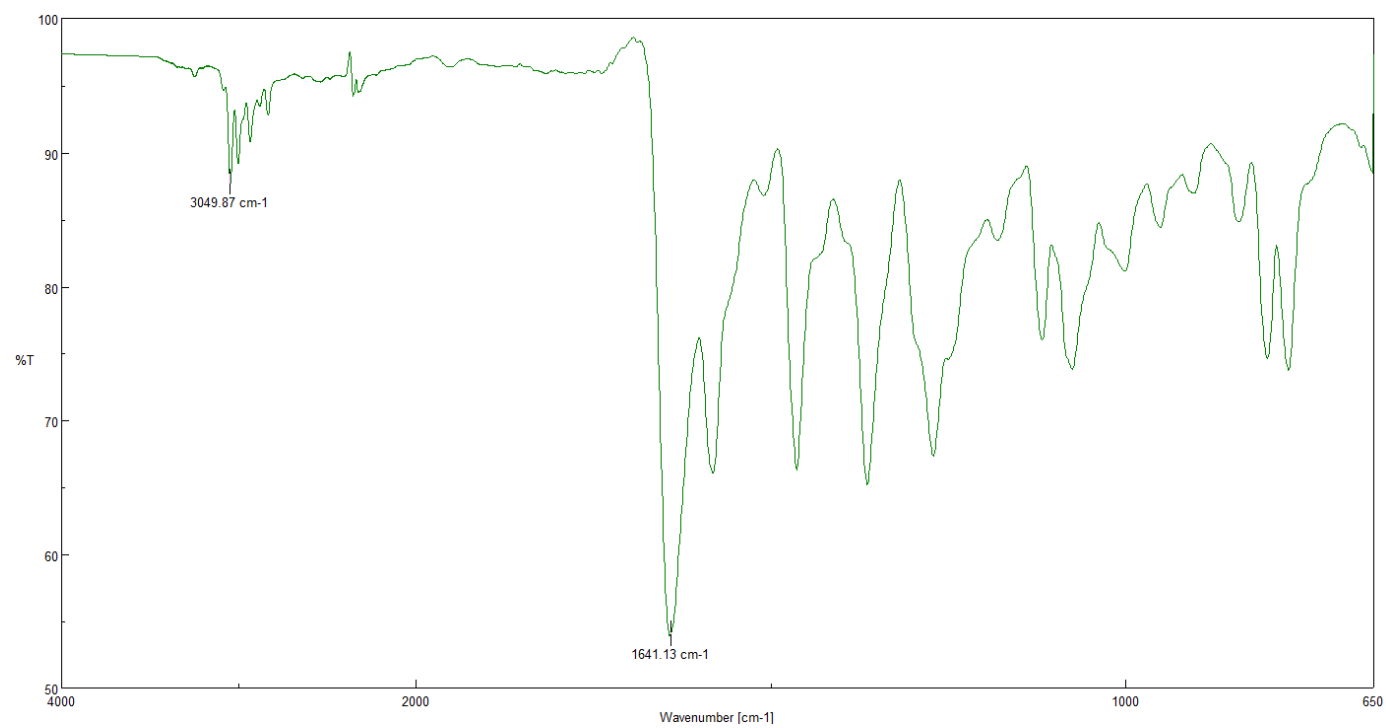

## Derivative 25

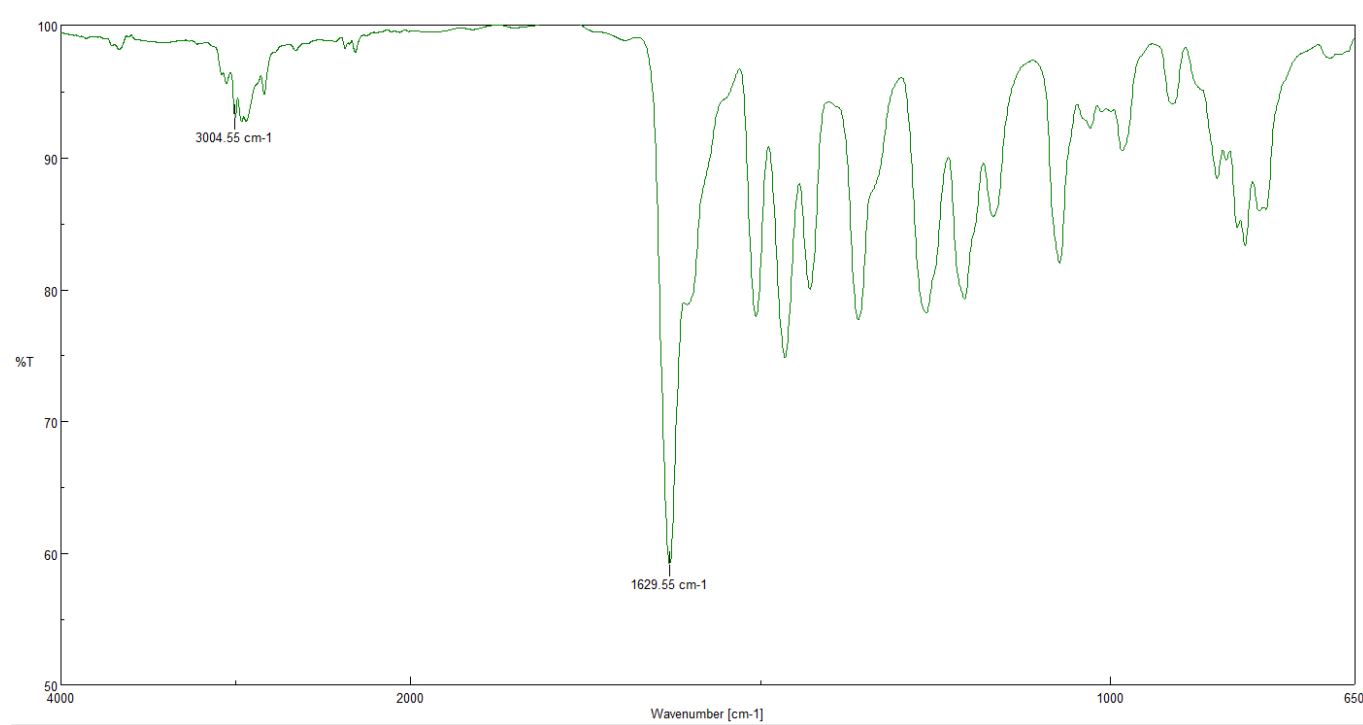

## Derivative 26

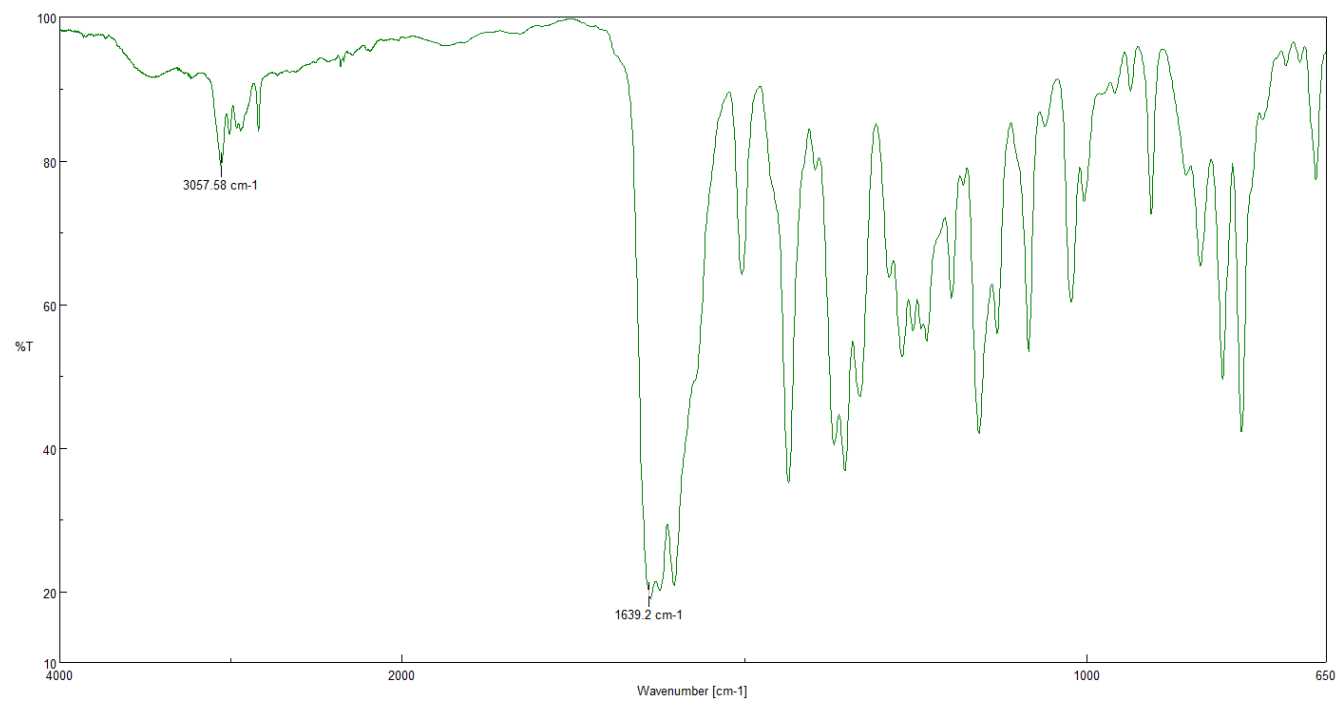

## Derivative 27

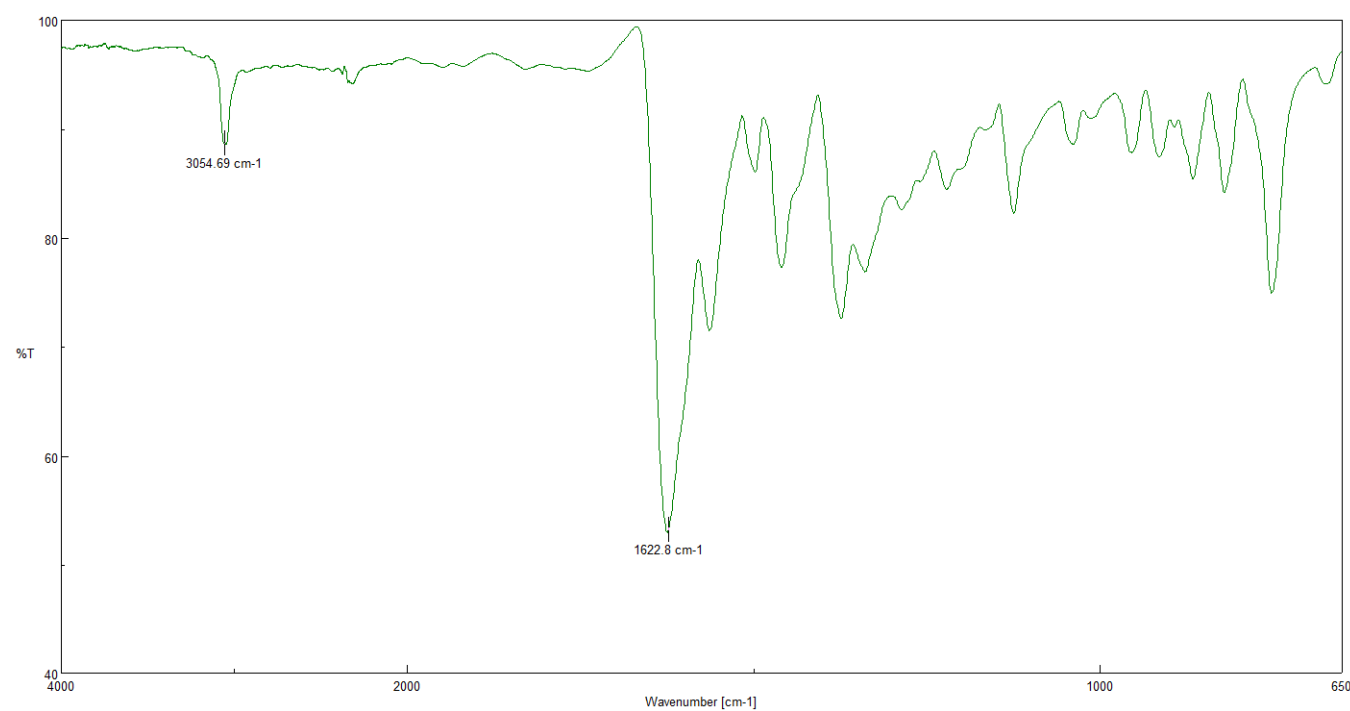

## Derivative 28

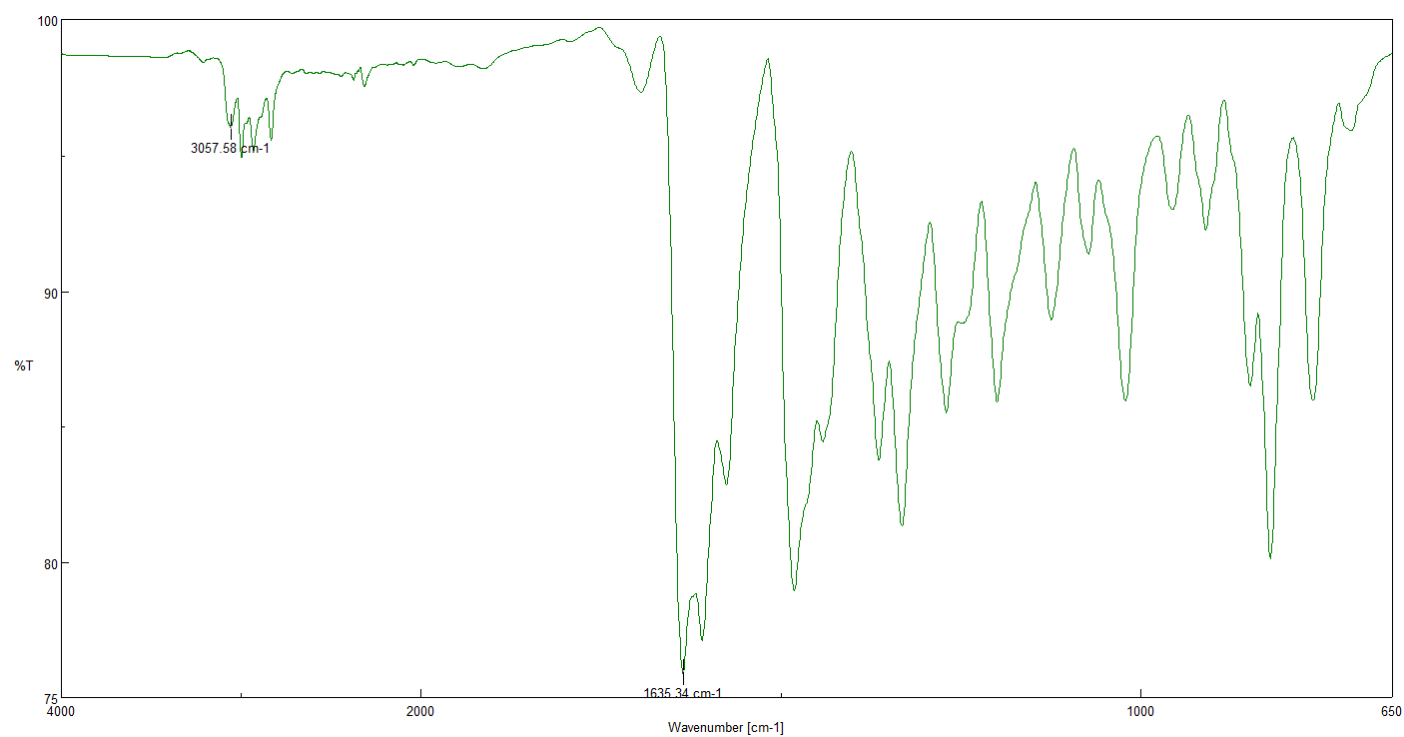

## Derivative 29

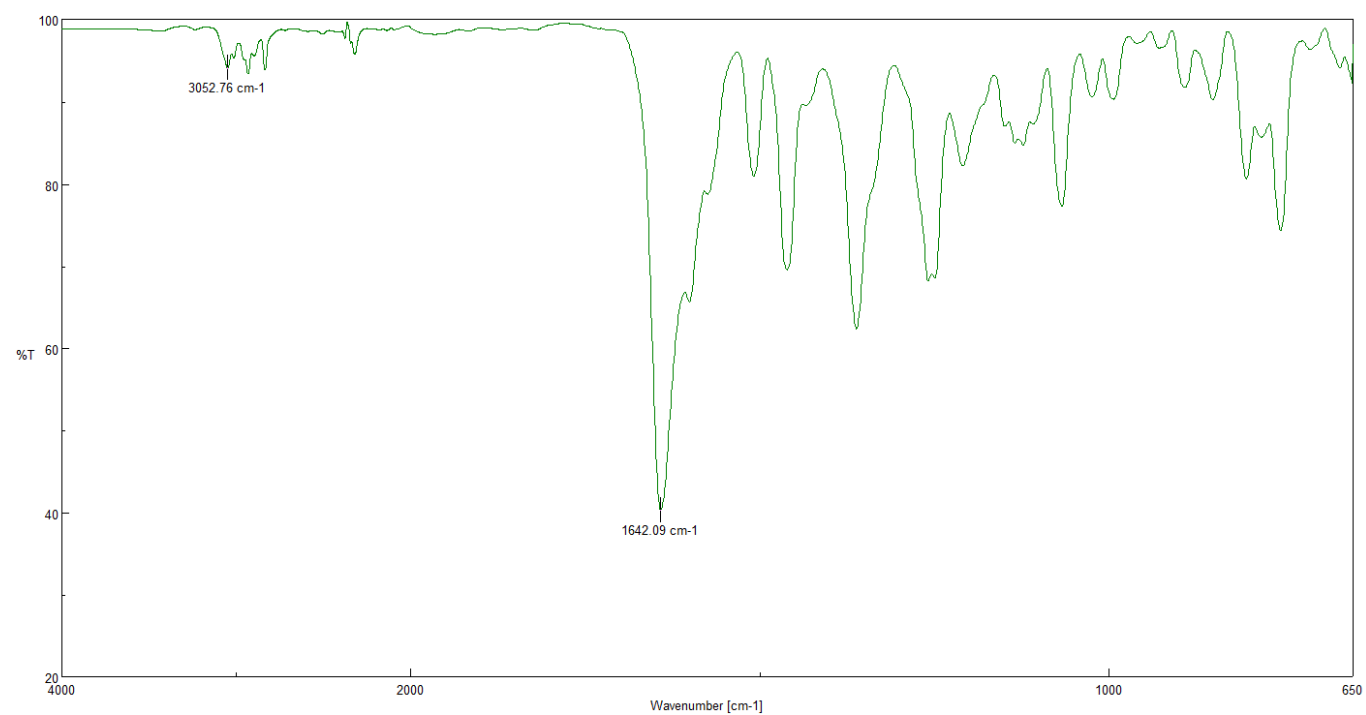

## Derivative 30

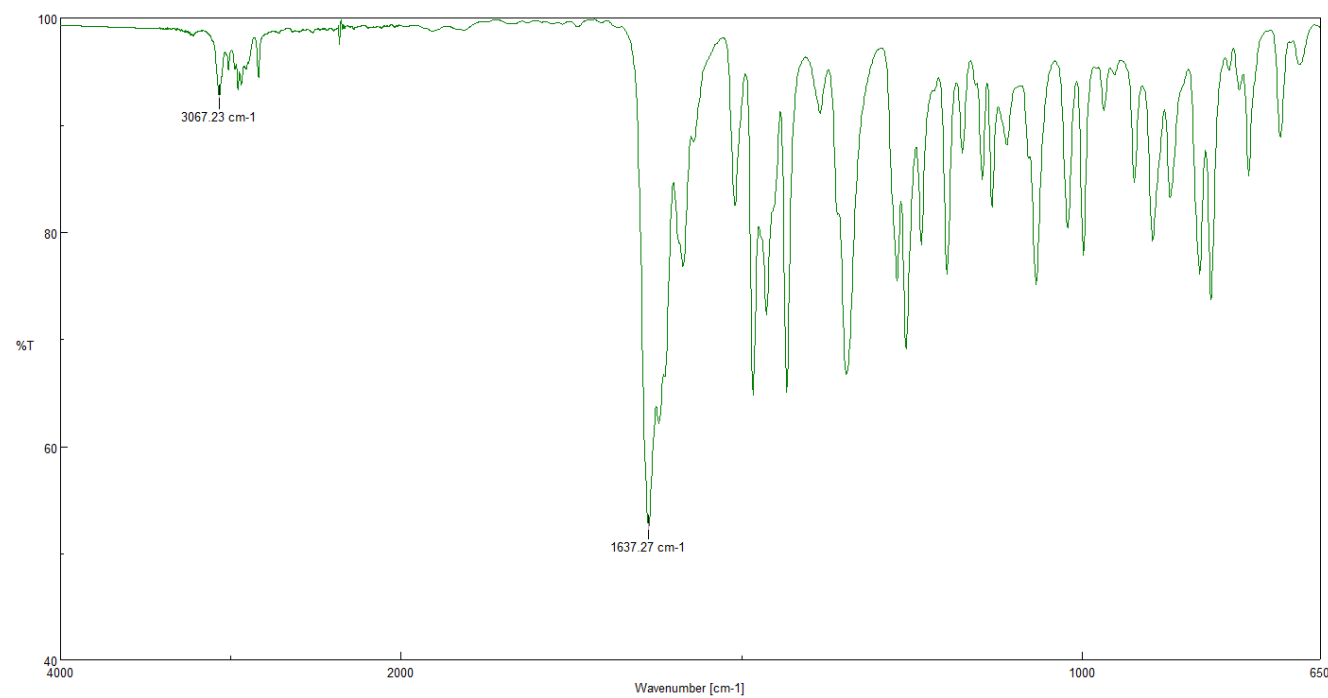

## Derivative 31

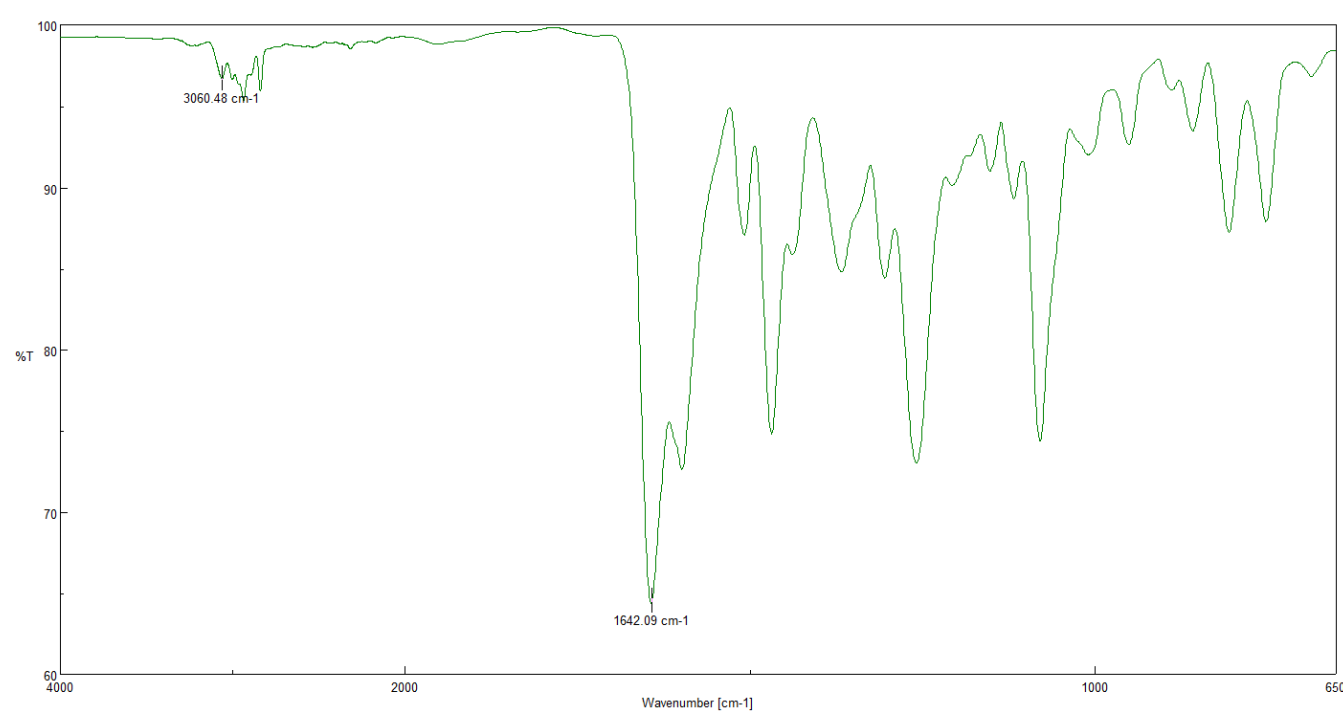

## Derivative 32

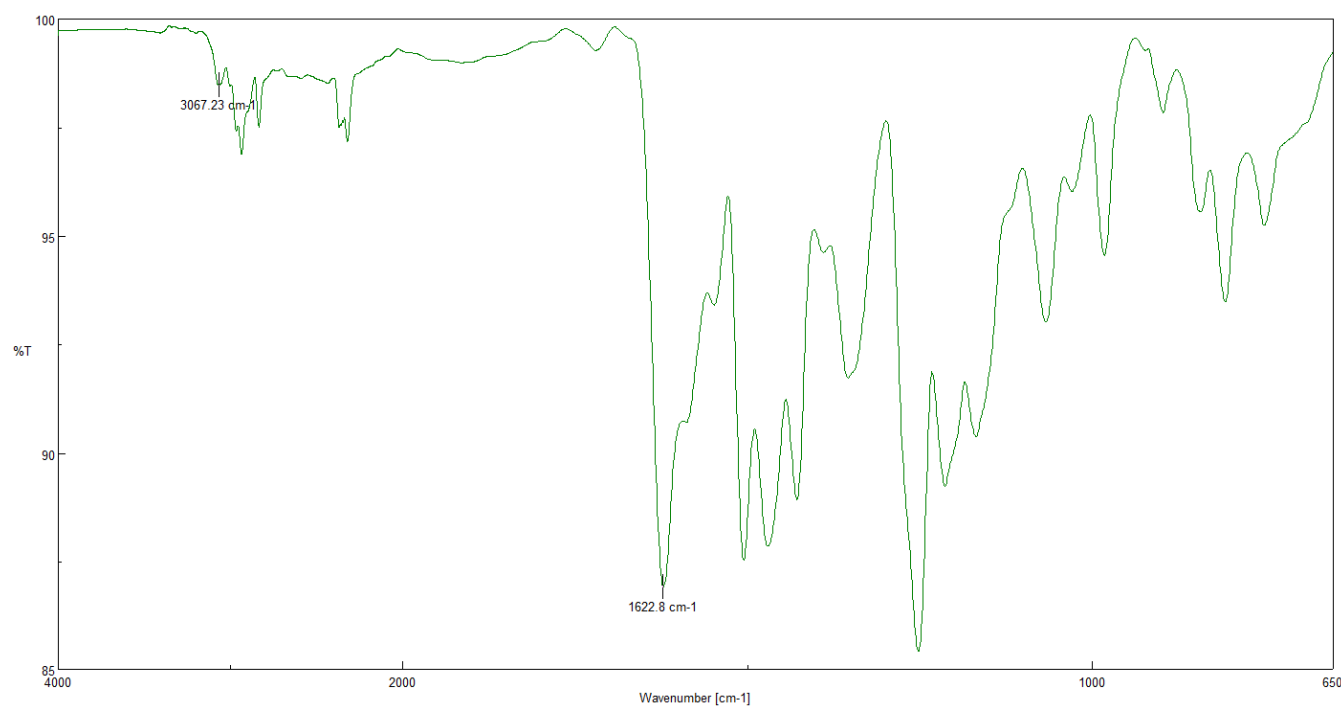

## Derivative 33

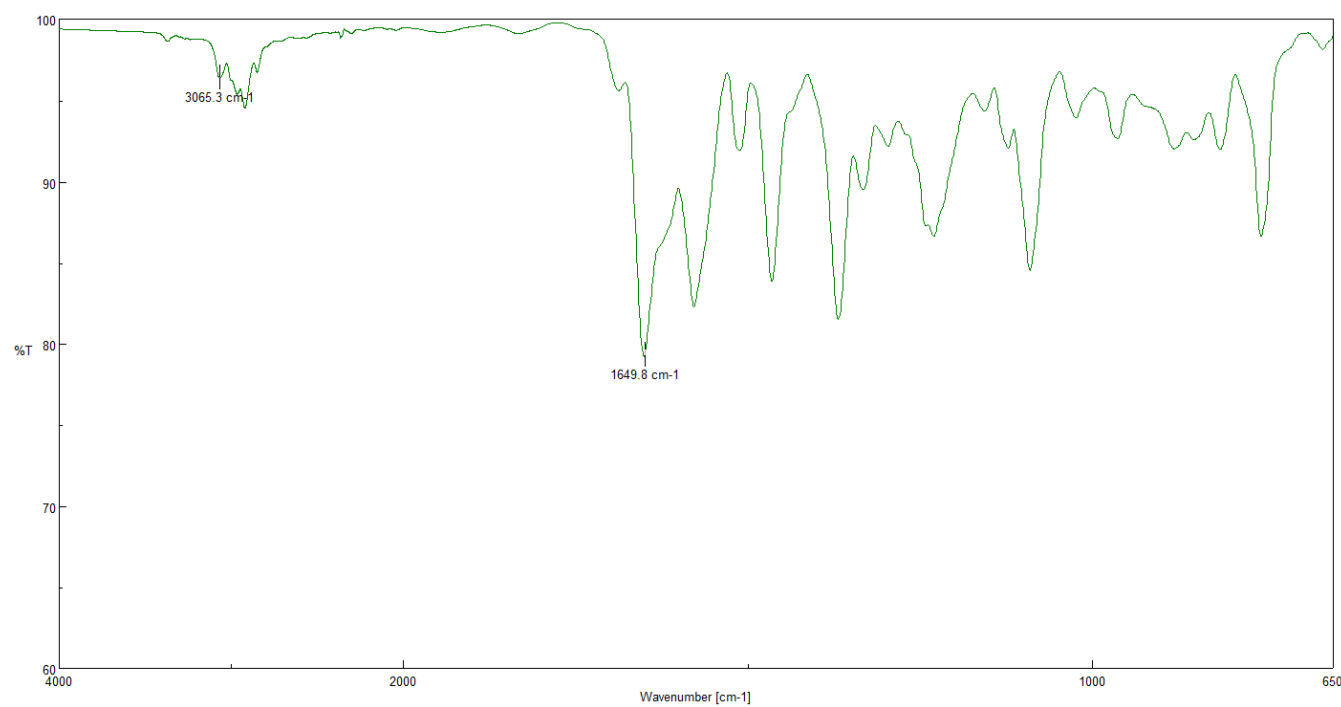

## Derivative 34

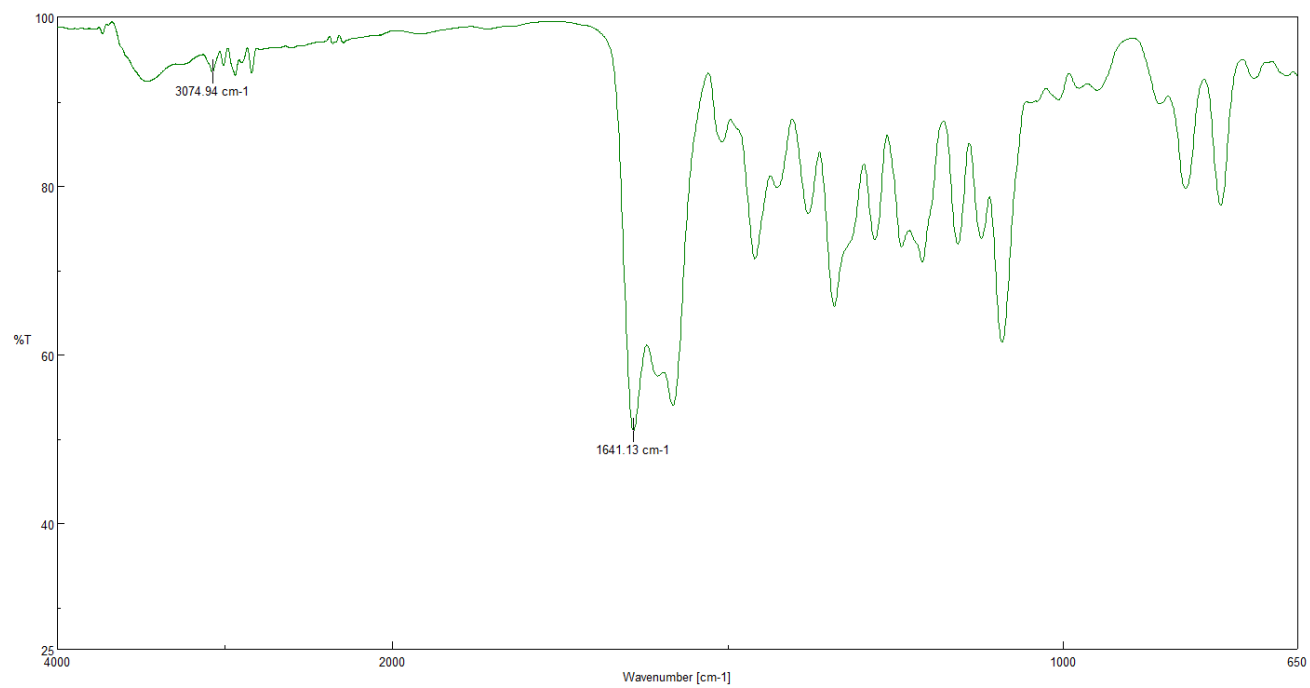

## Derivative 35

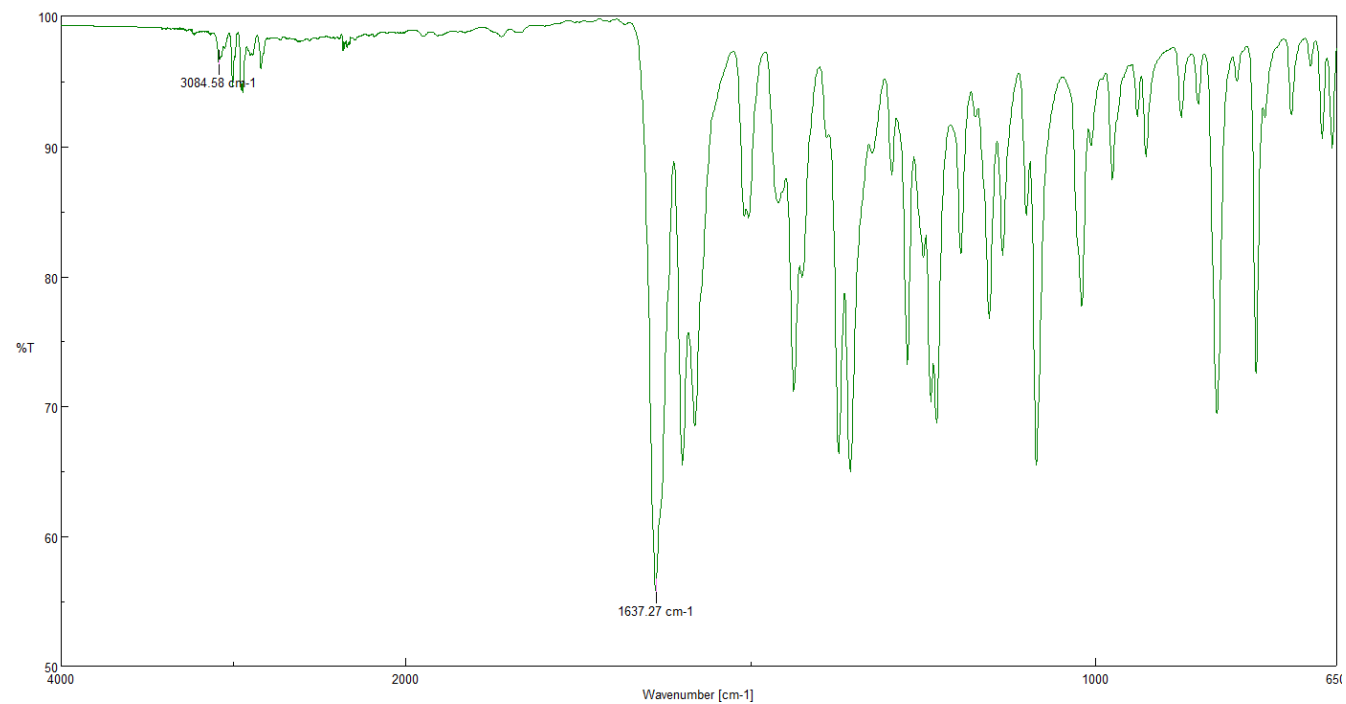

## Derivative 36

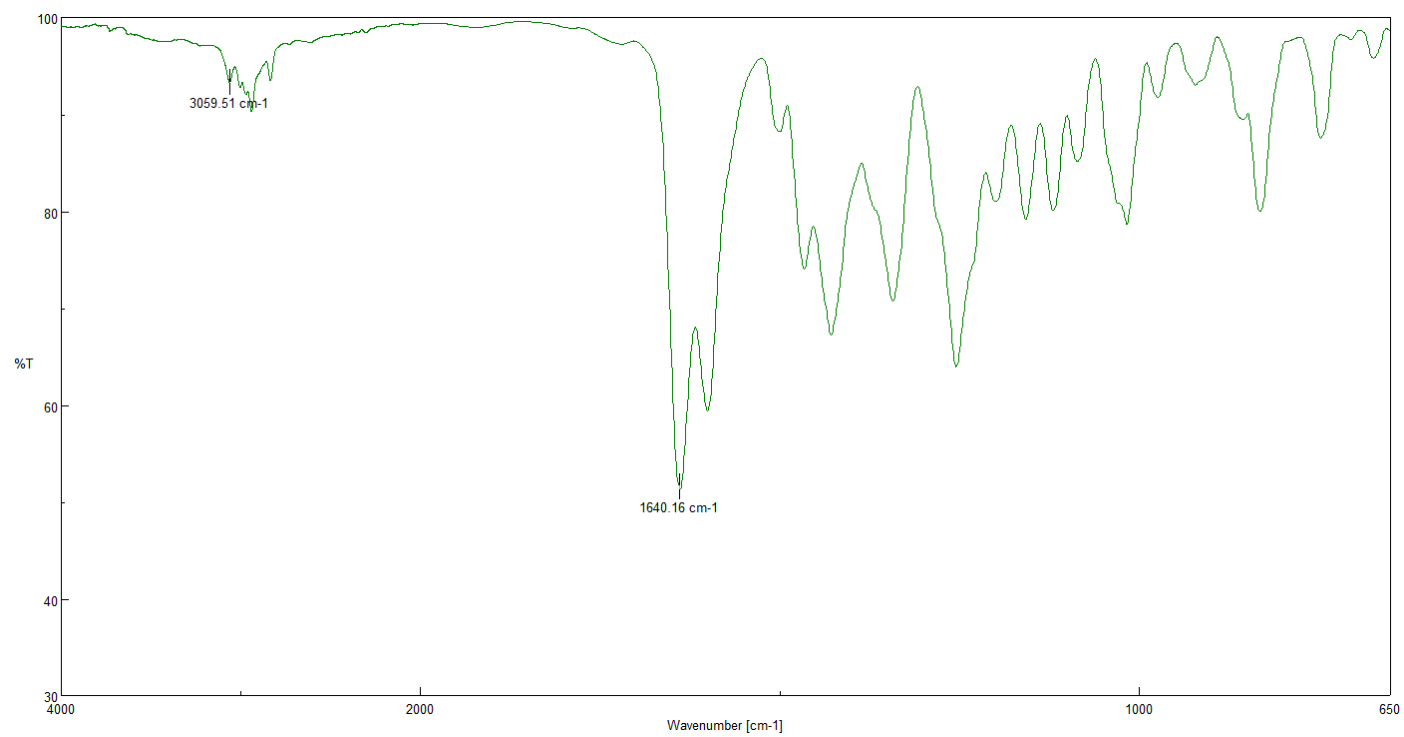

Supplement: Supplementary file 1 [file ijms-19-04086-s001.zip › IR spectra.pdf]
