# Supplementary material for: Inhibitory Effect of Synthetic Flavone Derivatives on Pan-Aurora Kinases: Induction of G2/M Cell-Cycle Arrest and Apoptosis in HCT116 Human Colon Cancer Cells
Source: Int J Mol Sci. 2018 Dec 17;19(12):4086. doi: 10.3390/ijms19124086 (PMC6320900; doi:10.3390/ijms19124086)

## The melting points, yields, purities, and IR data of the 36 flavone derivatives

### 2-(2-fluorophenyl)-3-hydroxy-4*H*-chromen-4-one (1)

Yield: 56%; m.p. 150-156°C; purity: 98%; IR (  $\nu/\text{cm}^{-1}$  )  $\nu$  (C=O, conjugated) : 1606,  $\nu$  (OH) : 3298

### 2-(2-fluorophenyl)-3-hydroxy-6-nitro-4*H*-chromen-4-one (2)

Yield: 96%; m.p. 194-200°C; purity: 98%; IR (  $\nu/\text{cm}^{-1}$  )  $\nu$  (C=O, conjugated) : 1622,  $\nu$  (OH) : 3289

### 2-(4-fluorophenyl)-3-hydroxy-6-nitro-4*H*-chromen-4-one (3)

Yield: 33%; m.p. 240-244°C; purity: 96%; IR (  $\nu/\text{cm}^{-1}$  )  $\nu$  (C=O, conjugated) : 1612,  $\nu$  (OH) : 3284

### 3-hydroxy-2-(4-methoxyphenyl)-4*H*-chromen-4-one (4)

Yield: 60%; m.p. 234-238°C; purity: 98%; IR (  $\nu/\text{cm}^{-1}$  )  $\nu$  (C=O, conjugated) : 1602,  $\nu$  (OH) : 3189

### 3-hydroxy-2-(2-methoxyphenyl)-4*H*-chromen-4-one (5)

Yield: 62%; m.p. 210-212°C; purity: 98%; IR (  $\nu/\text{cm}^{-1}$  )  $\nu$  (C=O, conjugated) : 1607,  $\nu$  (OH) : 3286

### 2-(3,4-dimethoxyphenyl)-3-hydroxy-4*H*-chromen-4-one (6)

Yield: 57%; m.p. 200-202°C; purity: 98%; IR (  $\nu/\text{cm}^{-1}$  )  $\nu$  (C=O, conjugated) : 1610,  $\nu$  (OH) : 3211

### 3-hydroxy-2-(2,4,6-trimethoxyphenyl)-4*H*-chromen-4-one (7)

Yield: 62%; m.p. 190-194°C; purity: 98%; IR (  $\nu/\text{cm}^{-1}$  )  $\nu$  (C=O, conjugated) : 1605,  $\nu$  (OH) : 3191

### 2-(2,4-dimethoxyphenyl)-3-hydroxy-4*H*-chromen-4-one (8)

Yield: 64%; m.p. 198-200°C; purity: 97%; IR (  $\nu/\text{cm}^{-1}$  )  $\nu$  (C=O, conjugated) : 1609,  $\nu$  (OH) : 3306

### 2-(6-(4-methoxystyryl)-2,4-dimethoxyphenyl)-3-hydroxy-4*H*-chromen-4-one (9)

Yield: 46%; m.p. 206-210°C; purity: 98%; IR (  $\nu/\text{cm}^{-1}$  )  $\nu$  (C=O, conjugated) : 1610,  $\nu$  (OH) : 3314

### 2-(6-(4-methoxystyryl)-2,4-dimethoxyphenyl)-3-hydroxy-6-nitro-4*H*-chromen-4-one (10)

Yield: 78%; m.p. 118-122°C; purity: 97%; IR (  $\nu/\text{cm}^{-1}$  )  $\nu$  (C=O, conjugated) : 1620,  $\nu$  (OH) : 3323

### 2-(6-(4-methoxystyryl)-2,4-dimethoxyphenyl)-6-bromo-3-hydroxy-4*H*-chromen-4-one (11)

Yield: 71%; m.p. 161-168°C; purity: 94%; IR (  $\nu/\text{cm}^{-1}$  )  $\nu$  (C=O, conjugated) : 1599,  $\nu$  (OH) : 3303

### 2-(6-(4-methoxystyryl)-2,4-dimethoxyphenyl)-7-fluoro-3-hydroxy-4*H*-chromen-4-one (12)

Yield: 80%; m.p. 228-230°C; purity: 98%; IR (  $\nu/\text{cm}^{-1}$  )  $\nu$  (C=O, conjugated) : 1606,  $\nu$  (OH) : 3289

2-(6-(4-methoxystyryl)-2,4-dimethoxyphenyl)-6-chloro-3-hydroxy-4*H*-chromen-4-one (**13**)

Yield: 56%; m.p. 180-182°C; purity: 98%; IR (  $\nu/\text{cm}^{-1}$  )  $\nu$  (C=O, conjugated) : 1598,  $\nu$  (OH) : 3314

2-(6-(4-methoxystyryl)-2,4-dimethoxyphenyl)-6-fluoro-3-hydroxy-4*H*-chromen-4-one (**14**)

Yield: 87%; m.p. 196-200°C; purity: 98%; IR (  $\nu/\text{cm}^{-1}$  )  $\nu$  (C=O, conjugated) : 1603,  $\nu$  (OH) : 3328

3-hydroxy-2-(naphthalen-1-yl)-4*H*-chromen-4-one (**15**)

Yield: 32%; m.p. 202-204°C; purity: 98%; IR (  $\nu/\text{cm}^{-1}$  )  $\nu$  (C=O, conjugated) : 1602,  $\nu$  (OH) : 3358

3-hydroxy-6-methoxy-2-(naphthalen-1-yl)-4*H*-chromen-4-one (**16**)

Yield: 31%; m.p. 220-226°C; purity: 96%; IR (  $\nu/\text{cm}^{-1}$  )  $\nu$  (C=O, conjugated) : 1605,  $\nu$  (OH) : 3290

3-hydroxy-2-(2-methoxynaphthalen-1-yl)-4*H*-chromen-4-one (**17**)

Yield: 94%; m.p. 240-242°C; purity: 98%; IR (  $\nu/\text{cm}^{-1}$  )  $\nu$  (C=O, conjugated) : 1608,  $\nu$  (OH) : 3278

2-(2,3-dimethoxynaphthalen-1-yl)-3-hydroxy-6-methoxy-4*H*-chromen-4-one (**18**)

Yield: 64%; m.p. 280-284°C; purity: 98%; IR (  $\nu/\text{cm}^{-1}$  )  $\nu$  (C=O, conjugated) : 1596,  $\nu$  (OH) : 3331

3-hydroxy-2-(4-methoxynaphthalen-1-yl)-4*H*-chromen-4-one (**19**)

Yield: 79%; m.p. 230-232°C; purity: 98%; IR (  $\nu/\text{cm}^{-1}$  )  $\nu$  (C=O, conjugated) : 1617,  $\nu$  (OH) : 3339

3-hydroxy-2-(naphthalen-2-yl)-4*H*-chromen-4-one (**20**)

Yield: 50%; m.p. 190-192°C; purity: 98%; IR (  $\nu/\text{cm}^{-1}$  )  $\nu$  (C=O, conjugated) : 1605,  $\nu$  (OH) : 3251

3-hydroxy-6-methoxy-2-(naphthalen-2-yl)-4*H*-chromen-4-one (**21**)

Yield: 40%; m.p. 200-203°C; purity: 98%; IR (  $\nu/\text{cm}^{-1}$  )  $\nu$  (C=O, conjugated) : 1599,  $\nu$  (OH) : 3320

2-(naphthalen-1-yl)-4*H*-chromen-4-one (**22**)

Yield: 84%; m.p. 117-122°C; purity: 98%; IR (  $\nu/\text{cm}^{-1}$  )  $\nu$  (C=O, conjugated) : 1651,  $\nu$  (CH,  $\text{sp}^2$ ) : 3052

6-methoxy-2-(naphthalen-1-yl)-4*H*-chromen-4-one (**23**)

Yield: 39%; m.p. 108-112°C; purity: 98%; IR (  $\nu/\text{cm}^{-1}$  )  $\nu$  (C=O, conjugated) : 1640,  $\nu$  (CH,  $\text{sp}^2$ ) : 3052

5-methoxy-2-(naphthalen-1-yl)-4*H*-chromen-4-one (**24**)

Yield: 50%; m.p. 202-206°C; purity: 96%; IR (  $\nu/\text{cm}^{-1}$  )  $\nu$  (C=O, conjugated) : 1641,  $\nu$  (CH,  $\text{sp}^2$ ) : 3049

**6,7-dimethoxy-2-(naphthalen-1-yl)-4*H*-chromen-4-one (25)**

Yield: 45%; m.p. 170-176°C; purity: 98%; IR (  $\nu/\text{cm}^{-1}$  )  $\nu$  (C=O, conjugated) : 1629,  $\nu$  (CH,  $\text{sp}^2$ ) : 3004

**7-methoxy-2-(naphthalen-1-yl)-4*H*-chromen-4-one (26)**

Yield: 10%; m.p. 102-106°C; purity: 98%; IR (  $\nu/\text{cm}^{-1}$  )  $\nu$  (C=O, conjugated) : 1639,  $\nu$  (CH,  $\text{sp}^2$ ) : 3057

**2-(naphthalen-2-yl)-4*H*-chromen-4-one (27)**

Yield: 24%; m.p. 158°C; purity: 96%; IR (  $\nu/\text{cm}^{-1}$  )  $\nu$  (C=O, conjugated) : 1622,  $\nu$  (CH,  $\text{sp}^2$ ) : 3054

**6-methoxy-2-(naphthalen-2-yl)-4*H*-chromen-4-one (28)**

Yield: 70%; m.p. 210-214°C; purity: 97%; IR (  $\nu/\text{cm}^{-1}$  )  $\nu$  (C=O, conjugated) : 3057,  $\nu$  (CH,  $\text{sp}^2$ ) : 1635

**2-(2-methoxynaphthalen-1-yl)-4*H*-chromen-4-one (29)**

Yield: 81%; m.p. 200-202°C; purity: 98%; IR (  $\nu/\text{cm}^{-1}$  )  $\nu$  (C=O, conjugated) : 3052,  $\nu$  (CH,  $\text{sp}^2$ ) : 1642

**6-methoxy-2-(2-methoxynaphthalen-1-yl)-4*H*-chromen-4-one (30)**

Yield: 44%; m.p. 187-189°C; purity: 98%; IR (  $\nu/\text{cm}^{-1}$  )  $\nu$  (C=O, conjugated) : 1637,  $\nu$  (CH,  $\text{sp}^2$ ) : 3067

**5-methoxy-2-(2-methoxynaphthalen-1-yl)-4*H*-chromen-4-one (31)**

Yield: 85%; m.p. 74-78°C; purity: 98%; IR (  $\nu/\text{cm}^{-1}$  )  $\nu$  (C=O, conjugated) : 1642,  $\nu$  (CH,  $\text{sp}^2$ ) : 3060

**6,7-dimethoxy-2-(2-methoxynaphthalen-1-yl)-4*H*-chromen-4-one (32)**

Yield: 22%; m.p. 226-230°C; purity: 98%; IR (  $\nu/\text{cm}^{-1}$  )  $\nu$  (C=O, conjugated) : 1622,  $\nu$  (CH,  $\text{sp}^2$ ) : 3067

**2-(4-methoxynaphthalen-1-yl)-4*H*-chromen-4-one (33)**

Yield: 59%; m.p. 175-180°C; purity: 97%; IR (  $\nu/\text{cm}^{-1}$  )  $\nu$  (C=O, conjugated) : 1649,  $\nu$  (CH,  $\text{sp}^2$ ) : 3065

**5,7-dimethoxy-2-(4-methoxynaphthalen-1-yl)-4*H*-chromen-4-one (34)**

Yield: 98%; m.p. 202-208°C; purity: 97%; IR (  $\nu/\text{cm}^{-1}$  )  $\nu$  (C=O, conjugated) : 1641,  $\nu$  (CH,  $\text{sp}^2$ ) : 3074

**7-methoxy-2-(4-methoxynaphthalen-1-yl)-4*H*-chromen-4-one (35)**

Yield: 22%; m.p. 184-188°C; purity: 98%; IR (  $\nu/\text{cm}^{-1}$  )  $\nu$  (C=O, conjugated) : 1637,  $\nu$  (CH,  $\text{sp}^2$ ) : 3084

**2-(2,3-dimethoxynaphthalen-1-yl)-7-methoxy-4*H*-chromen-4-one (36)**

Yield: 95%; m.p. 154-160°C; purity: 95%; IR (  $\nu/\text{cm}^{-1}$ )  $\nu$  (C=O, conjugated) : 1640,  $\nu$  (CH,  $\text{sp}^2$ ) : 3059

**Supp. Table 1.** A comparison of the pGI<sub>50</sub> values obtained from the clonogenic long-term survival assay with the values predicted using the CoMFA model, and their residual values. \* denotes the derivatives contained in the test set.

| derivatives | Experimental data (pGI <sub>50</sub> ) | Predicted value (pGI <sub>50</sub> ) | Residual (%) |
|-------------|----------------------------------------|--------------------------------------|--------------|
| <b>1</b>    | 1.39                                   | 1.46                                 | -5.08        |
| <b>2</b>    | 1.47                                   | 1.60                                 | -8.18        |
| <b>3</b>    | 2.35                                   | 2.28                                 | 2.89         |
| <b>4</b>    | 1.43                                   | 1.36                                 | 4.99         |
| <b>5</b>    | 1.78                                   | 1.82                                 | -2.02        |
| <b>6</b>    | 2.44                                   | 2.50                                 | -2.32        |
| <b>7*</b>   | 2.34                                   | 2.19                                 | 6.80         |
| <b>8</b>    | 1.66                                   | 1.63                                 | 1.99         |
| <b>9</b>    | 2.50                                   | 2.51                                 | -0.49        |
| <b>10*</b>  | 2.44                                   | 2.64                                 | -8.01        |
| <b>11</b>   | 2.58                                   | 2.57                                 | 0.29         |
| <b>12</b>   | 2.51                                   | 2.50                                 | 0.40         |
| <b>13</b>   | 2.54                                   | 2.54                                 | 0.11         |
| <b>14*</b>  | 2.62                                   | 2.44                                 | 6.79         |
| <b>15</b>   | 2.38                                   | 2.26                                 | 5.12         |
| <b>16</b>   | 2.14                                   | 2.19                                 | -2.39        |
| <b>17*</b>  | 2.28                                   | 2.85                                 | -24.96       |
| <b>18</b>   | 2.12                                   | 2.15                                 | -1.40        |
| <b>19</b>   | 2.37                                   | 2.38                                 | -0.67        |
| <b>20</b>   | 2.62                                   | 2.61                                 | 0.24         |
| <b>21</b>   | 2.51                                   | 2.56                                 | -1.65        |
| <b>22*</b>  | 2.54                                   | 2.06                                 | 18.69        |
| <b>23</b>   | 2.62                                   | 2.40                                 | 8.29         |
| <b>24</b>   | 2.14                                   | 2.17                                 | -1.44        |
| <b>25</b>   | 2.49                                   | 2.56                                 | -2.82        |
| <b>26</b>   | 2.59                                   | 2.59                                 | 0.13         |
| <b>27</b>   | 1.52                                   | 1.57                                 | -2.74        |
| <b>28</b>   | 1.61                                   | 1.55                                 | 3.81         |
| <b>29*</b>  | 2.39                                   | 2.70                                 | -12.81       |
| <b>30</b>   | 2.56                                   | 2.61                                 | -2.23        |
| <b>31</b>   | 3.31                                   | 3.31                                 | -0.14        |
| <b>32*</b>  | 2.42                                   | 2.81                                 | -15.99       |
| <b>33</b>   | 1.68                                   | 1.65                                 | 1.68         |
| <b>34</b>   | 1.67                                   | 1.59                                 | 4.53         |
| <b>35</b>   | 1.74                                   | 1.83                                 | -5.15        |
| <b>36</b>   | 2.40                                   | 2.38                                 | 0.89         |

**Supp. Table 2.** A comparison of the pGI<sub>50</sub> values obtained from the clonogenic long-term survival assay with the values predicted using the CoMSIA model, and their residual values. \* denotes the derivatives contained in the test set.

| derivatives | Experimental data (pGI <sub>50</sub> ) | Predicted value (pGI <sub>50</sub> ) | Residual (%) |
|-------------|----------------------------------------|--------------------------------------|--------------|
| <b>1</b>    | 1.39                                   | 1.30                                 | 6.01         |
| <b>2</b>    | 1.47                                   | 1.59                                 | -7.80        |
| <b>3</b>    | 2.35                                   | 2.19                                 | 6.56         |
| <b>4</b>    | 1.43                                   | 1.40                                 | 2.21         |
| <b>5</b>    | 1.78                                   | 1.75                                 | 1.70         |
| <b>6</b>    | 2.44                                   | 2.55                                 | -4.35        |
| <b>7*</b>   | 2.34                                   | 1.84                                 | 21.57        |
| <b>8</b>    | 1.66                                   | 1.55                                 | 6.76         |
| <b>9</b>    | 2.50                                   | 2.56                                 | -2.40        |
| <b>10*</b>  | 2.44                                   | 2.84                                 | -16.44       |
| <b>11</b>   | 2.58                                   | 2.49                                 | 3.51         |
| <b>12</b>   | 2.51                                   | 2.61                                 | -3.92        |
| <b>13</b>   | 2.54                                   | 2.49                                 | 2.17         |
| <b>14*</b>  | 2.62                                   | 2.43                                 | 7.34         |
| <b>15</b>   | 2.38                                   | 2.37                                 | 0.58         |
| <b>16</b>   | 2.14                                   | 2.33                                 | -8.82        |
| <b>17*</b>  | 2.28                                   | 2.82                                 | -23.92       |
| <b>18</b>   | 2.12                                   | 2.17                                 | -2.12        |
| <b>19</b>   | 2.37                                   | 2.26                                 | 4.76         |
| <b>20</b>   | 2.62                                   | 2.61                                 | 0.18         |
| <b>21</b>   | 2.51                                   | 2.59                                 | -3.14        |
| <b>22*</b>  | 2.54                                   | 2.10                                 | 17.18        |
| <b>23</b>   | 2.62                                   | 2.36                                 | 9.76         |
| <b>24</b>   | 2.14                                   | 2.13                                 | 0.42         |
| <b>25</b>   | 2.49                                   | 2.44                                 | 1.72         |
| <b>26</b>   | 2.59                                   | 2.54                                 | 2.13         |
| <b>27</b>   | 1.52                                   | 1.69                                 | -10.62       |
| <b>28</b>   | 1.61                                   | 1.70                                 | -5.35        |
| <b>29*</b>  | 2.39                                   | 2.70                                 | -12.71       |
| <b>30</b>   | 2.56                                   | 2.71                                 | -5.99        |
| <b>31</b>   | 3.31                                   | 3.24                                 | 2.11         |
| <b>32*</b>  | 2.42                                   | 2.78                                 | -14.91       |
| <b>33</b>   | 1.68                                   | 1.70                                 | -0.80        |
| <b>34</b>   | 1.67                                   | 1.61                                 | 3.26         |
| <b>35</b>   | 1.74                                   | 1.88                                 | -7.77        |
| <b>36</b>   | 2.40                                   | 2.34                                 | 2.82         |

**Suppl. Table 3.** Structures of the 36 flavone derivatives.

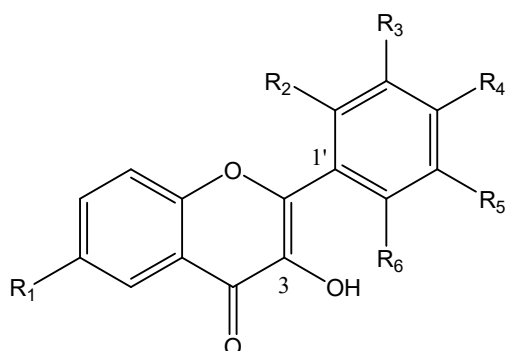

| derivative | R <sub>1</sub>  | R <sub>2</sub>   | R <sub>3</sub>   | R <sub>4</sub>   | R <sub>5</sub> | R <sub>6</sub>   |
|------------|-----------------|------------------|------------------|------------------|----------------|------------------|
| <b>1</b>   | H               | F                | H                | H                | H              | H                |
| <b>2</b>   | NO <sub>2</sub> | F                | H                | H                | H              | H                |
| <b>3</b>   | NO <sub>2</sub> | H                | H                | F                | H              | H                |
| <b>4</b>   | H               | H                | H                | OCH <sub>3</sub> | H              | H                |
| <b>5</b>   | H               | OCH <sub>3</sub> | H                | H                | H              | H                |
| <b>6</b>   | H               | H                | OCH <sub>3</sub> | OCH <sub>3</sub> | H              | H                |
| <b>7</b>   | H               | OCH <sub>3</sub> | H                | OCH <sub>3</sub> | H              | OCH <sub>3</sub> |
| <b>8</b>   | H               | OCH <sub>3</sub> | H                | OCH <sub>3</sub> | H              | H                |

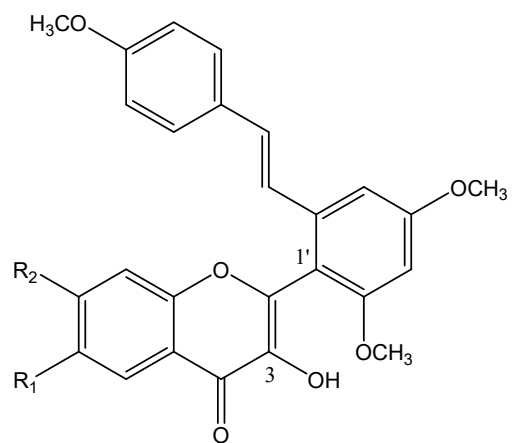

| derivative | R <sub>1</sub>  | R <sub>2</sub> |
|------------|-----------------|----------------|
| <b>9</b>   | H               | H              |
| <b>10</b>  | NO <sub>2</sub> | H              |
| <b>11</b>  | Br              | H              |
| <b>12</b>  | H               | F              |
| <b>13</b>  | Cl              | H              |
| <b>14</b>  | F               | H              |

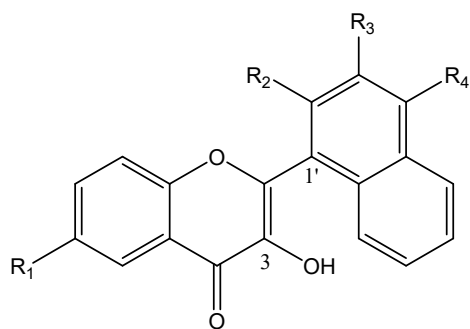

| derivative | R <sub>1</sub>   | R <sub>2</sub>   | R <sub>3</sub>   | R <sub>4</sub>   |
|------------|------------------|------------------|------------------|------------------|
| <b>15</b>  | H                | H                | H                | H                |
| <b>16</b>  | OCH <sub>3</sub> | H                | H                | H                |
| <b>17</b>  | H                | OCH <sub>3</sub> | H                | H                |
| <b>18</b>  | OCH <sub>3</sub> | OCH <sub>3</sub> | OCH <sub>3</sub> | H                |
| <b>19</b>  | H                | H                | H                | OCH <sub>3</sub> |

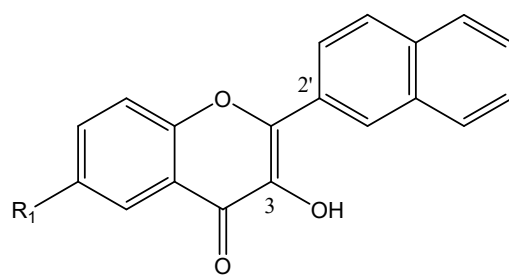

| derivative | R <sub>1</sub>   |
|------------|------------------|
| <b>20</b>  | H                |
| <b>21</b>  | OCH <sub>3</sub> |

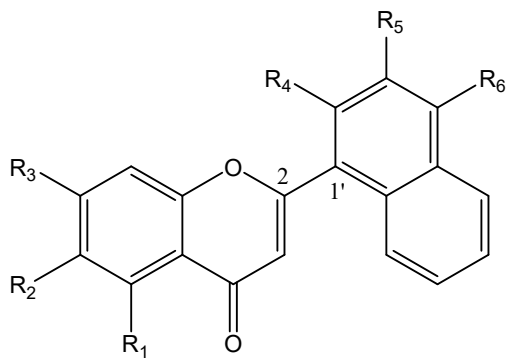

| derivative | R <sub>1</sub>   | R <sub>2</sub>   | R <sub>3</sub>   | R <sub>4</sub>   | R <sub>5</sub>   | R <sub>6</sub>   |
|------------|------------------|------------------|------------------|------------------|------------------|------------------|
| <b>22</b>  | H                | H                | H                | H                | H                | H                |
| <b>23</b>  | H                | OCH <sub>3</sub> | H                | H                | H                | H                |
| <b>24</b>  | OCH <sub>3</sub> | H                | H                | H                | H                | H                |
| <b>25</b>  | H                | OCH <sub>3</sub> | OCH <sub>3</sub> | H                | H                | H                |
| <b>26</b>  | H                | H                | OCH <sub>3</sub> | H                | H                | H                |
| <b>29</b>  | H                | H                | H                | OCH <sub>3</sub> | H                | H                |
| <b>30</b>  | H                | OCH <sub>3</sub> | H                | OCH <sub>3</sub> | H                | H                |
| <b>31</b>  | OCH <sub>3</sub> | H                | H                | OCH <sub>3</sub> | H                | H                |
| <b>32</b>  | H                | OCH <sub>3</sub> | OCH <sub>3</sub> | OCH <sub>3</sub> | H                | H                |
| <b>33</b>  | H                | H                | H                | H                | H                | OCH <sub>3</sub> |
| <b>34</b>  | OCH <sub>3</sub> | H                | OCH <sub>3</sub> | H                | H                | OCH <sub>3</sub> |
| <b>35</b>  | H                | H                | OCH <sub>3</sub> | H                | H                | OCH <sub>3</sub> |
| <b>36</b>  | H                | H                | OCH <sub>3</sub> | OCH <sub>3</sub> | OCH <sub>3</sub> | H                |

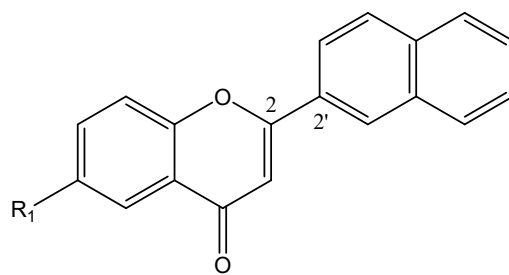

| derivative | $R_1$            |
|------------|------------------|
| <b>27</b>  | H                |
| <b>28</b>  | OCH <sub>3</sub> |

**Suppl. Figure 1.** Hierarchical clustering analysis used to select the test set.

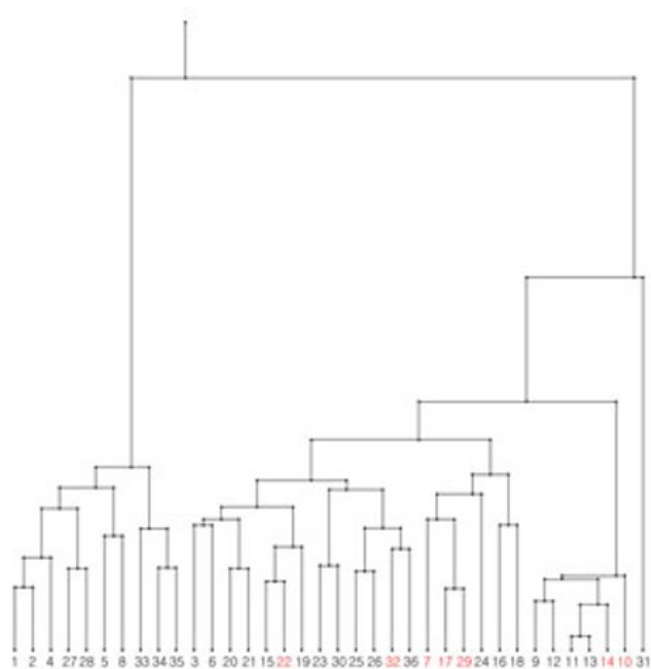

**Suppl. Figure 2.** Alignments of 29 derivatives included in the training set.

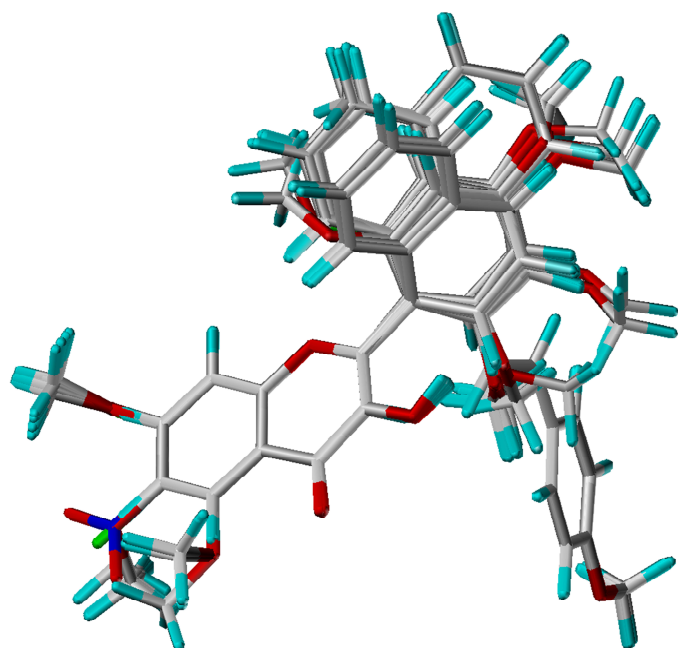

**Suppl. Figure 3.** A comparison of the experimental  $\text{pGI}_{50}$  values obtained from the clonogenic long-term survival assay with the values predicted using the CoMFA model. The training set and the test set are denoted in blue and red squares, respectively.

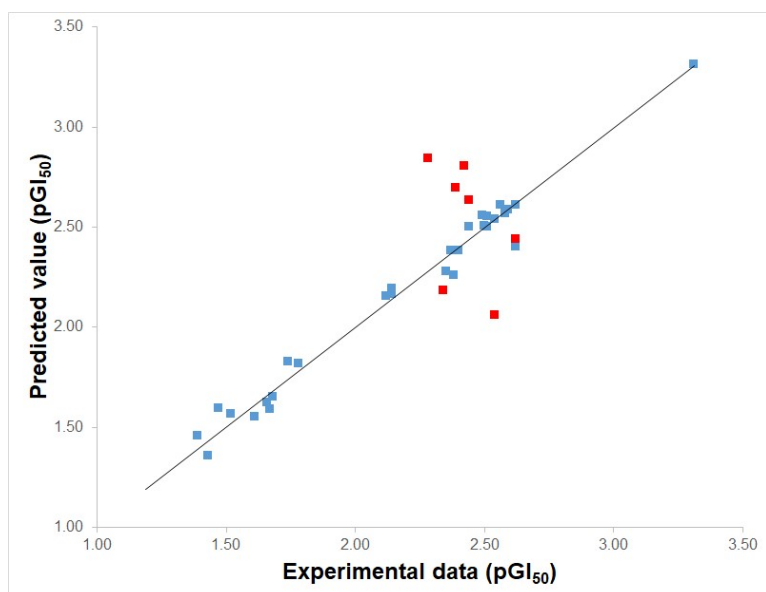

**Suppl. Figure 4.** (A) Contour maps of steric field descriptors generated by the CoMFA model. The bulk favoring (green) and disfavoring regions (yellow) occupied 92% and 8%, respectively. (B) Contour maps of electrostatic field descriptors. The electrostatic favoring (blue) and disfavoring regions (red) occupied 1% and 99% of the maps, respectively.

(A)

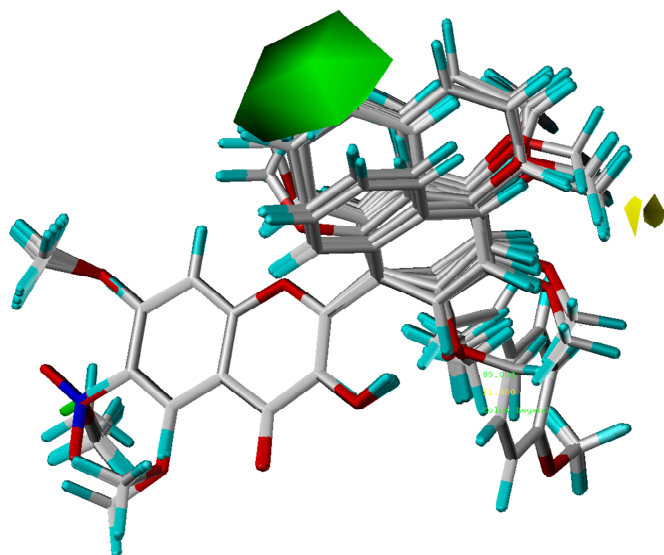

(B)

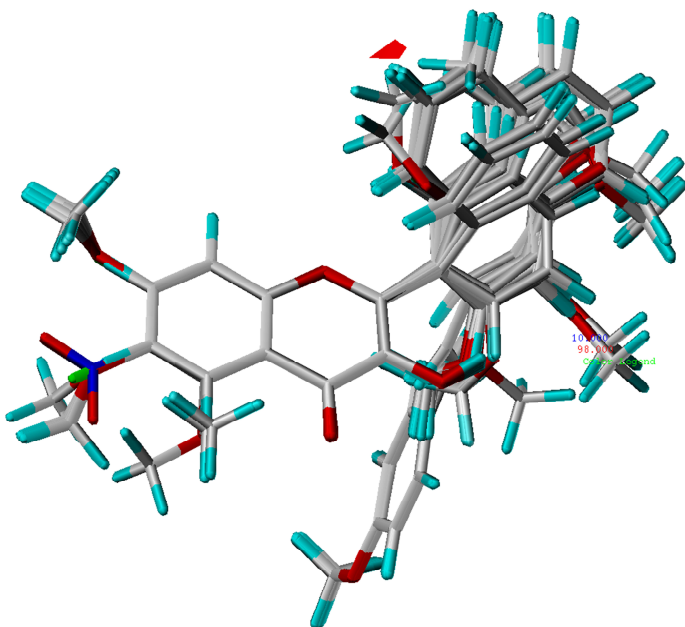

**Suppl. Figure 5.** A comparison of the experimental  $\text{pGI}_{50}$  values obtained from the clonogenic long-term survival assay with the values predicted using the CoMSIA model. The training set and the test set are denoted in blue and red squares, respectively.

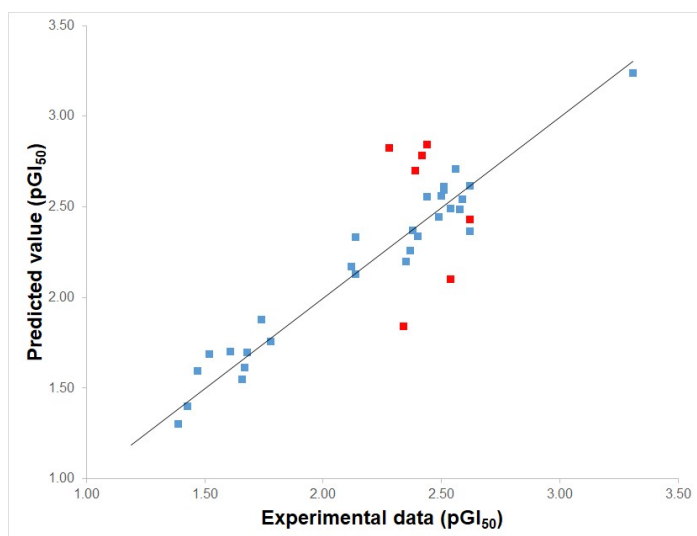

**Suppl. Figure 6.** Contour maps of hydrophobic field descriptors generated by the CoMSIA model. The hydrophobic favoring region (orange) occupied 95% and the disfavoring region (violet) 5%, of the contour map area.

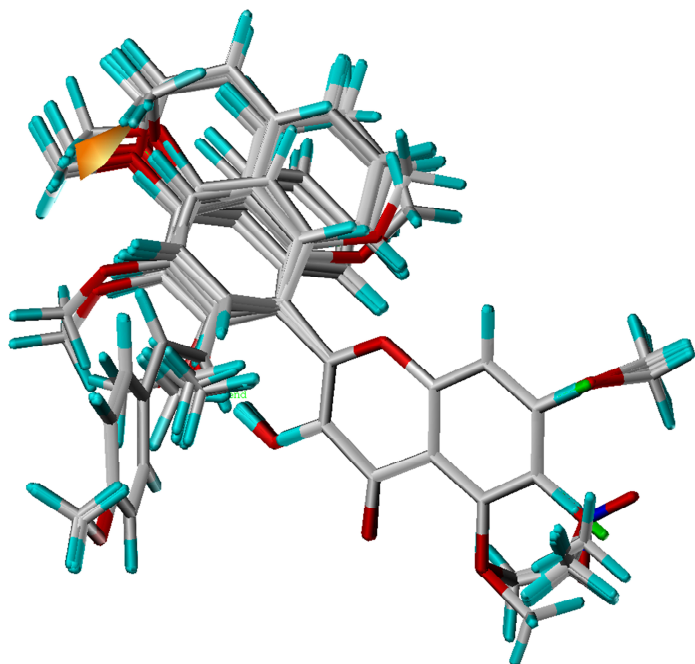

**Suppl. Figure 7.** The structure of the ligand contained in AURKA deposited in the protein data bank as 3uod.pdb, 4-[(4-{[2-(trifluoromethyl)phenyl]amino}pyrimidin-2-yl)amino]benzoic acid.

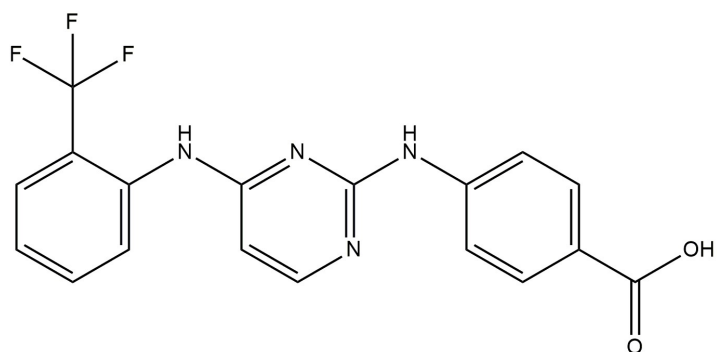

**Suppl. Figure 8.** Residues residing in the binding site of the AURKA – TPB complex obtained by the LigPlot analysis.

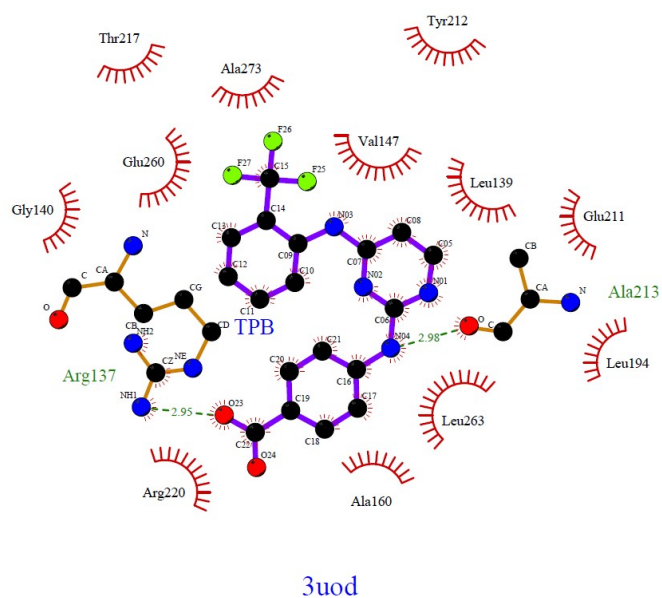

**Suppl. Figure 9.** Residues residing in the binding site of the AURKA – derivative **31** complex obtained by the LigPlot analysis.

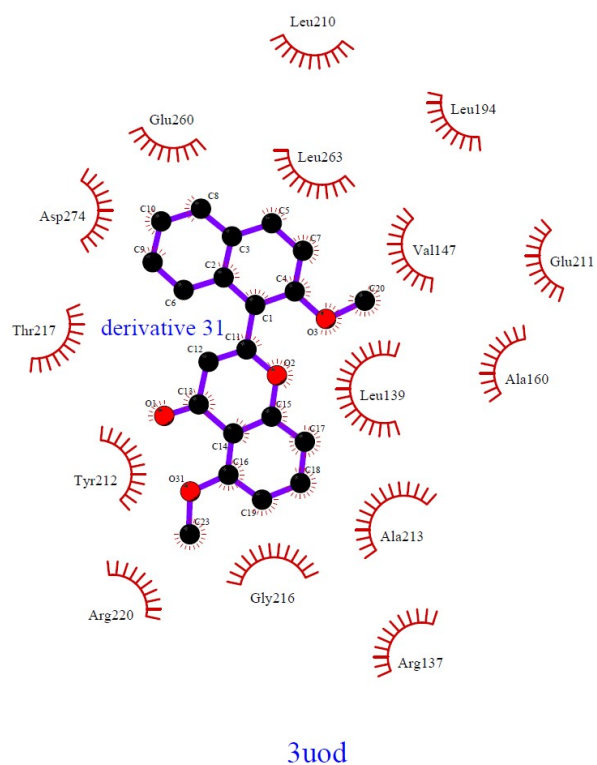

**Suppl. Figure 10.** Residues residing in the binding site of the AURKB – VX6 complex obtained by the LigPlot analysis.

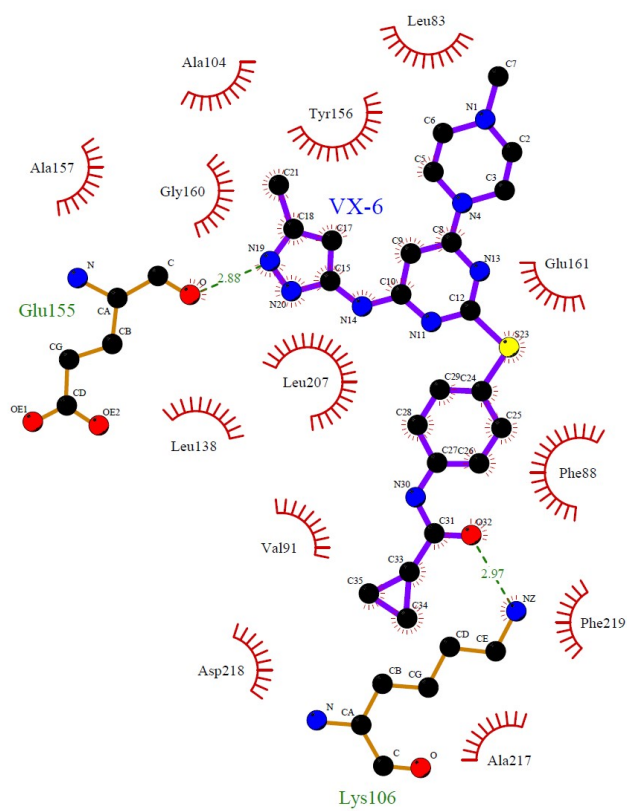

4af3

**Suppl. Figure 11.** Residues residing in the binding site of the AURKB – derivative **31** complex obtained by the LigPlot analysis.

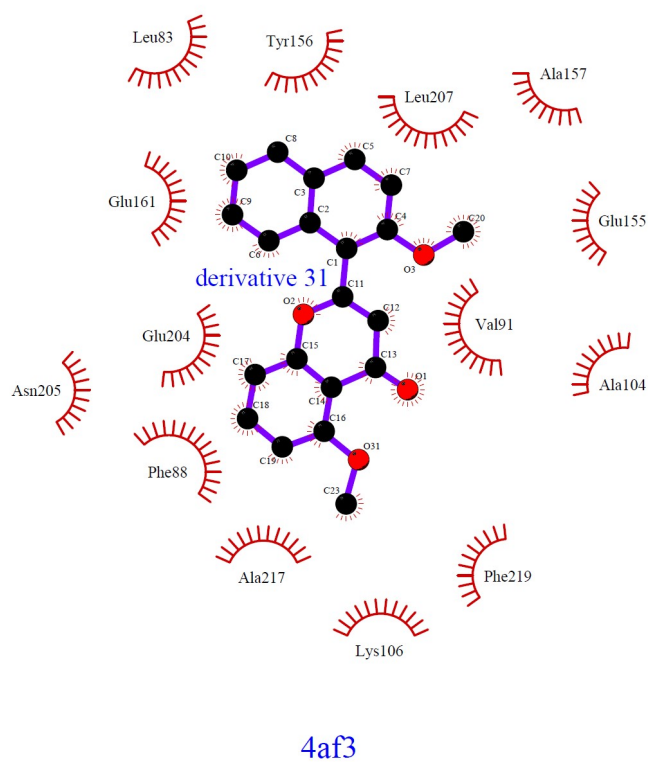

**Suppl. Scheme 1.** The synthetic procedure of 36 flavone derivatives [*Magn Reson Chem* **2017**, 55, 359].

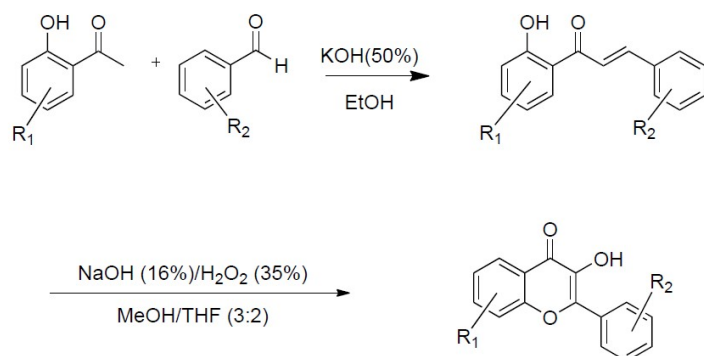

Supplement: Supplementary file 1 [file ijms-19-04086-s001.zip › supplementary materials.pdf]
